# Supplementary material for: Did expansion of health insurance coverage reduce horizontal inequity in healthcare finance? A decomposition analysis for China
Source: PubMed Central journal article supplement — BMJ Open. 2019 Jan 9;9(1):e025184. doi: 10.1136/bmjopen-2018-025184 (PMC6340012; doi:10.1136/bmjopen-2018-025184), 2019-01-09
Supplement: bmjopen-2018-025184.draft_revisions.pdf [file bmjopen-2018-025184.draft_revisions.pdf]

# BMJ Open

BMJ Open is committed to open peer review. As part of this commitment we make the peer review history of every article we publish publicly available.

When an article is published we post the peer reviewers' comments and the authors' responses online. We also post the versions of the paper that were used during peer review. These are the versions that the peer review comments apply to.

The versions of the paper that follow are the versions that were submitted during the peer review process. They are not the versions of record or the final published versions. They should not be cited or distributed as the published version of this manuscript.

BMJ Open is an open access journal and the full, final, typeset and author-corrected version of record of the manuscript is available on our site with no access controls, subscription charges or pay-per-view fees (<http://bmjopen.bmj.com>).

If you have any questions on BMJ Open's open peer review process please email [info.bmjopen@bmj.com](mailto:info.bmjopen@bmj.com)

# BMJ Open

## Did expansion of health insurance coverage reduce horizontal inequity? A decomposition analysis for China

|                               |                                                                                                                                                                                                                                                                                                                                                                                                                                                                                                                      |
|-------------------------------|----------------------------------------------------------------------------------------------------------------------------------------------------------------------------------------------------------------------------------------------------------------------------------------------------------------------------------------------------------------------------------------------------------------------------------------------------------------------------------------------------------------------|
| Journal:                      | <i>BMJ Open</i>                                                                                                                                                                                                                                                                                                                                                                                                                                                                                                      |
| Manuscript ID                 | bmjopen-2018-025184                                                                                                                                                                                                                                                                                                                                                                                                                                                                                                  |
| Article Type:                 | Research                                                                                                                                                                                                                                                                                                                                                                                                                                                                                                             |
| Date Submitted by the Author: | 03-Jul-2018                                                                                                                                                                                                                                                                                                                                                                                                                                                                                                          |
| Complete List of Authors:     | Wang, Zhonghua ; Nanjing Medical University, School of Health Policy and Management<br>Zhou, Xue; Mudanjiang Medical University, Institute of Health Management<br>Gao, Yukuan; Nanjing Medical University, School of Health Policy and Management<br>Chen, Mingsheng; Nanjing Medical University, School of Health Policy and Management<br>Palmer, Andrew; University of Tasmania, Menzies Institute for Medical Research; University of Tasmania,<br>Si, Lei; Macquarie University, Centre for the Health Economy |
| Keywords:                     | horizontal inequity, redistributive effect, health insurance, payment, financing                                                                                                                                                                                                                                                                                                                                                                                                                                     |
|                               |                                                                                                                                                                                                                                                                                                                                                                                                                                                                                                                      |

SCHOLARONE™  
Manuscripts

1  
2  
3 **Did expansion of health insurance coverage reduce horizontal inequity? A**  
4 **decomposition analysis for China**  
5  
6  
7

8  
9 **Authors and affiliations**  
10

11 Zhonghua Wang<sup>1,2</sup>, Xue Zhou<sup>3</sup>, Yukuan Gao<sup>1</sup>, Mingsheng Chen<sup>1,2,\*</sup>, Andrew J.  
12 Palmer<sup>4,5</sup>, Lei Si<sup>6</sup>  
13  
14

15 <sup>1</sup> School of Health Policy & Management, Nanjing Medical University, 211166  
16 Nanjing, China  
17  
18

19 <sup>2</sup> Creative Health Policy Research Group, Nanjing Medical University, 211166  
20 Nanjing, China  
21  
22

23 <sup>3</sup> Institute of Health Management, Mudanjiang Medical University, Mudanjiang,  
24 China  
25  
26

27 <sup>4</sup> Menzies Institute for Medical Research, University of Tasmania, Hobart, Australia  
28  
29

30 <sup>5</sup> Centre for Health Policy, School of Population and Global Health, University of  
31 Melbourne, Melbourne, Australia  
32  
33

34 <sup>6</sup> Centre for the Health Economy, Macquarie University, New South Wales, Australia  
35  
36

37 \* **Corresponding author:** Mingsheng Chen, School of Health Policy & Management,  
38 Nanjing Medical University, 101 Longmian Avenue, Jiangning District, Nanjing  
39 211166, P.R. China. Email: [cms@njmu.edu.cn](mailto:cms@njmu.edu.cn). Telephone and fax number: +81 025  
40 86868507  
41  
42  
43  
44

45 **Funding:** This study is funded by the National Natural Science Foundation of China  
46 (Grant number: 71503137). LS is supported by a NHMRC Early Career Fellowship  
47 (GNT1139826). The funding bodies were not involved in the design of the study, or  
48 data collection, analysis, and interpretation or in writing the manuscript.  
49  
50  
51  
52  
53  
54  
55  
56  
57

## Abstract

**Objectives** China has launched new and extended the established types of health care insurance since 1998. Individuals with equal income-levels but different attributes such as social status, profession, geographic access to health care, and health conditions, are covered in the health care insurance. However, research is lacking on horizontal inequity in health care finance. This study aims to examine horizontal inequity in the Chinese health care financing system in 2002 and 2007 through two rounds of national household health surveys.

**Setting** Heilongjiang Province of China.

**Design** Two rounds of cross-sectional study.

**Participants** Adopting a multi-stage stratified random sampling, 3,841 households with 11,572 individuals in 2003 and 5530 households with 15,817 individuals in 2008 were selected.

**Methods** The decomposition method of Aronson et al. (1994) was used in the study to measure the redistributive effects and horizontal inequity in health care finance.

**Findings** Over the period 2002–2007, the absolute value of horizontal inequity in total health care payments was reduced from 93.85 percentage points to 35.50 percentage points in urban areas, and from 113.19 percentage points to 37.12 percentage points in rural areas. For public health insurance, it increased from 17.84 percentage points to 28.02 percentage points in urban areas, and decreased from 127.93 percentage points to 0.36 percentage points in rural areas. Horizontal inequity in out-of-pocket payments was reduced from 79.92 percentage points to 24.83 percentage points in urban areas, and from 127.71 percentage points to 53.10 percentage points in rural areas.

**Conclusions:** Our results have shown that horizontal inequity in total health care

1  
2  
3 financing decreased over the period 2002-2007 in China. In addition, out-of-pocket  
4 payments contributed most to the extent of horizontal inequity which was reduced  
5 both in urban and rural areas over the period 2002–2007.  
6  
7  
8  
9

10  
11 **Key words:** horizontal inequity; redistributive effect; health insurance; payment;  
12 financing  
13

#### 14 **Strengths and limitations of this study**

- 15  
16 ● This study was the first to evaluate the horizontal inequity in health care  
17 finance in China.  
18
- 19 ● The study was the first to explore the relationship between the vertical  
20 and horizontal equity in health care financing system in China.  
21
- 22 ● Our study has shown that horizontal inequity also contributed to the  
23 overall inequity in health care finance and should be simultaneously  
24 considered with vertical inequity when renovating the health care  
25 financing system.  
26
- 27 ● The cross-sectional study design precluded any causal interpretation.  
28  
29  
30  
31  
32  
33  
34  
35  
36  
37  
38  
39  
40  
41  
42  
43  
44  
45  
46  
47  
48  
49  
50  
51  
52  
53  
54  
55  
56  
57

## Introduction

Apart from securing access to health care, contributions toward financing health care may redistribute the disposable income of households. This redistribution can be assessed on the vertical and horizontal level. Vertical redistribution occurs when health care payments are disproportionately related to ability-to-pay (ATP). Horizontal redistribution occurs when people with equal ATP contribute unequally to health care payments. Vertical and horizontal redistribution are generally defined as redistributive effect (RE). RE can be quantitatively decomposed into three portions—vertical, horizontal and reranking [1]. Vertical equity implies that people with greater economic ability should pay more and horizontal equity implies that people with equal economic ability should pay the same. Reranking occurs when the rank order changes before and after health care payments.

RE in a particular health care financing system depends not only on vertical inequity, but also on the extent of any horizontal inequity associated with the system and on the extent of any reranking resulting from it. The vertical effect shows how households with different incomes are affected by the financing, and the horizontal effect measures the inequity generated among households with the same pre-financing income, while the reranking effect quantifies the change in the order of income distribution. A considerable amount of literature has been published on vertical equity [2-5]. Horizontal inequity, and reranking, by contrast, were not reported in great detail until 1994. In that year, J. Richard Aronson, Paul Johnson and Peter J. Lambert (hereafter AJL) provided a decomposition method to measure the RE of income tax through pre- and post-Gini coefficients, and revealed the separate contributions to the RE of income tax of: (i) the effective schedule (the ‘vertical effect’), (ii) the unequal treatment of equals arising from departures from this effective schedule (the

1  
2  
3 'horizontal effect') and (iii) the reranking of unequals as a result of such departures  
4 (the 'reranking effect'). [6] Later, in 1997, Wagstaff and van Doorslaer applied the  
5 AJL method to decompose the change in income inequality caused by health care  
6 finance into vertical, horizontal and reranking effects in the Netherlands; each effect  
7 corresponding to a different dimension of equity: vertical equity, horizontal inequity  
8 and reranking [1]. By simultaneously revealing these three different dimensions of  
9 equity, the AJL decomposition constitutes a useful tool for assessing the fairness of  
10 health care financing. Since then, horizontal inequity has been measured and  
11 evaluated in empirical studies using the AJL decomposition method. These studies  
12 indicated that factors such as social status, geographic distribution, employment type,  
13 insurance type, income composition, urban-rural classification, health condition, and  
14 race may contribute to horizontal inequity and reranking[1, 7, 8]. However, only three  
15 papers conducted empirical evaluation of horizontal inequity in health care finance for  
16 the Netherlands, Switzerland, and Sweden, respectively [1, 7, 8]. Moreover, until now,  
17 no such empirical assessments have been conducted in China. Little is known about  
18 the extent of horizontal inequity in health care finance during the reform of China's  
19 health care insurance in the past decades.

20  
21  
22  
23  
24  
25  
26  
27  
28  
29  
30  
31  
32  
33  
34  
35  
36  
37  
38  
39  
40 China has established new types of health insurance since 1998. Health insurance  
41 coverage has been expanded to individuals with different socioeconomic status. In  
42 each socioeconomic group, individuals joined in health insurance scheme with  
43 different social status, urban-rural classifications, and geographic access to health care.  
44 Until recently, there has been no reliable evidence to evaluate whether or not China's  
45 expansion of health insurance coverage is successful in reducing horizontal inequity  
46 in health care finance. This study aims to examine the RE and horizontal inequity in  
47 the Chinese health care financing system in 2002 and 2007 for four different sources  
48  
49  
50  
51  
52  
53  
54  
55  
56

1  
2  
3 of financing, namely general taxes, public health insurance, private health insurance,  
4 and out-of-pocket (OOP) payments.  
5

6  
7 The remainder of the paper proceeds as follows: Section 2 contains a brief  
8 overview of Chinese health insurance reform. Section 3 outlines our data sources and  
9 describes the computational methods used in this study. Section 4 presents the  
10 findings of the study, and outlines how empirical results in different financing sources,  
11 areas and times are compared. Finally, Section 5 and 6 discuss the empirical results  
12 and attempts to draw some conclusions in relation to broad lessons from the Chinese  
13 experience.  
14  
15  
16  
17  
18  
19  
20  
21

### 22 **China's health insurance reform**

23  
24 Influenced by social and economic transitions since the early 1980s, China's health  
25 care system was reformed to transit from one based on a planned economic model to a  
26 market-based system. Government health input rapidly reduced with the  
27 decentralization of health care financing [9]. As a result, the share of public funding in  
28 the health care system decreased and the proportion of private financing increased  
29 [10]. For instance, under China's planned economy, health care in urban areas had  
30 been financed primarily through the Government Welfare Insurance Scheme (GWIS)  
31 and the Labor Insurance Scheme (LIS). The former covered mainly civil servants and  
32 government employees, college students, and veterans, whereas the latter was for  
33 workers and their dependents across all formal sectors of the economy [9, 11].  
34  
35 However, these schemes faced challenges in market-oriented economic reforms,  
36 which resulted in huge changes in health care financing patterns. Along with the  
37 higher demand by employees for quality care, and corresponding financial pressures  
38 making these demands unaffordable, financing from GWIS and LIS decreased  
39 markedly and citizens had to pay much higher OOP expenses for health care [12].  
40  
41  
42  
43  
44  
45  
46  
47  
48  
49  
50  
51  
52  
53  
54  
55  
56  
57  
58  
59  
60



1  
2  
3 Meanwhile, for the majority of the rural population, the poor in particular, the  
4 Cooperative Medical Scheme (CMS) played a key role in guaranteeing access to basic  
5 health services [13, 14]. However, CMS began to collapse after the initiation of  
6 China's Household Contract Responsibility System in the early 1980s, which decreed  
7 that health care would be funded at household level. Only 9.3% of rural farmers were  
8 still enrolled in the CMS, and over 80% had no health insurance coverage by 2002  
9 [15]. Rural residents without health insurance had to pay for their health care by direct  
10 payment, which created barriers to basic health services, and made medical expenses  
11 unaffordable to the poor and vulnerable groups, especially for health services that  
12 have become more expensive [16].  
13  
14  
15  
16  
17  
18  
19  
20  
21  
22  
23

24 Such transformations have greatly changed China's health care financing structure.  
25 Between 1980 and 2002, the percentage of government spending for health care  
26 dropped from 36.24% to 15.69% and the percentage of citizens covered by public  
27 health insurance dropped from 42.57% to 15.64%. Conversely, the share of health  
28 care spending as OOP payments increased from 21.19% to 57.72% [17]. Heavy  
29 dependence on OOP payments resulted in a segmented and tiered healthcare financing  
30 system [18]. The results of China's third round of National Health Services Survey  
31 showed that, in 2002, 48.9% of outpatients (57.0% and 45.8% in urban and rural areas,  
32 respectively) did not visit any health institution. Among those who were admitted but  
33 did not use inpatient services, 75.4% could not afford hospital expenses [15].  
34  
35  
36  
37  
38  
39  
40  
41  
42  
43  
44  
45

46 In order to decrease OOP and provide basic health insurance to the general  
47 population, China's government took steps to establish and extend insurance coverage.  
48 In 1998, Urban Employee Basic Medical Insurance (UEBMI) was initiated to cover  
49 urban workers in the formal sector. UEBMI coverage was gradually extended from  
50 covering employees in the larger formal sector to those working in all forms of  
51  
52  
53  
54  
55  
56  
57  
58  
59  
60

1  
2  
3 organizations, such as government institutions, state-owned and collective enterprises,  
4 private enterprises, enterprises with foreign investment, social organizations, and  
5 private non-enterprise units [19]. However, only providing coverage to urban workers  
6 raised equity concern in the remaining urban residents who were not covered by the  
7 UEBMI. Thus, in 2007, the Urban Residents' Basic Medical Insurance (URBMI) was  
8 initiated to extend urban health insurance coverage to an additional 155 million  
9 uninsured citizens, including the unemployed, children, students, and elderly persons  
10 without pensions [20]. Meanwhile, in rural areas, the New Rural Cooperative Medical  
11 Scheme (NCMS) was initiated in 2003 with the purpose of rebuilding rural health  
12 insurance. Since its formation, China's authorities have provided additional public  
13 spending on NCMS, which has achieved a high coverage level for rural residents,  
14 with the insured rate increasing from 9.64% in 2002 to 94.44% in 2007 [21].

## 28 **Methods**

### 30 **Data source**

31  
32  
33 The data for the analysis are drawn from two rounds of National Health Services  
34 Survey (NHSS) conducted in Heilongjiang Province, China. The two rounds were  
35 conducted in 2003 and 2008 in the sample regions, recording the information in 2002  
36 and 2007, respectively. Heilongjiang Province, located in the northeast of China, is a  
37 middle-income province in terms of per capita gross domestic product with a  
38 population of more than 20 million people [22]. Adopting a multi-stage stratified  
39 random sampling method, the survey randomly selected 13 cities or counties. In every  
40 city or county, data were collected from eight communities or villages and sorted by  
41 economic level and geographic distribution. Then, about 30 households were  
42 randomly selected from its communities or villages. Finally, 3841 households with  
43 11,572 individuals in 2003 and 5530 households with 15,817 individuals in 2008,  
44  
45  
46  
47  
48  
49  
50  
51  
52  
53  
54  
55  
56  
57  
58  
59  
60

1  
2  
3 respectively, were selected in the survey. Table 1 and table 2 present detailed data  
4  
5 about some descriptive and socioeconomic characteristics for urban and rural samples,  
6  
7 respectively.  
8  
9

10  
11 <insert table 1 here>

12  
13 <insert table 2 here>

14  
15  
16  
17  
18 The survey contains extensive information about households' socioeconomic and  
19  
20 demographic characteristics, including urban-rural classification, number of  
21  
22 household members, age, gender, educational attainment, professions of household  
23  
24 members, and household expenditures. Monthly household expenditure on food,  
25  
26 housing, clothing, traffic, electricity, water, fuel, communication, education, exercise,  
27  
28 entertainment, medical care and other types of expenditure were queried through the  
29  
30 household head or the member most familiar with the home's affairs. Unexpected  
31  
32 expenditures during the previous year were also recorded. Per capita household  
33  
34 expenditure adjusted by adult equivalence was used as the measure of ATP in our  
35  
36 study [23]. Regarding health care payments, information was computed through two  
37  
38 sources of data: one source was the survey above, other data were taken mainly from  
39  
40 the local statistic yearbook of tariffs, taxes and contribution rates for public health  
41  
42 insurance. With regard to general taxes, specific taxes that were considered included  
43  
44 taxes on the purchase of cigarettes, alcohol, entertainment, electricity, gas and any  
45  
46 excise taxes on restaurants, bars, lodging, and other consumption taxes. Taxes were  
47  
48 approximated by applying specific tax rates to the corresponding expenditures. The  
49  
50 proportion of government expenditure on health was 4.12% and 5.19% of government  
51  
52 expenditure in 2002 and 2007, respectively [17]. Since the government expenditure  
53  
54  
55  
56  
57  
58  
59  
60

1  
2  
3 mainly came from general taxes, we assumed that the health financing took 4.12%  
4 and 5.19% of the total general taxes in 2002 and 2007, respectively. With regard to  
5 public health insurance, flat rate contributions were recorded directly in household  
6 interviews with respondents covered by the URBMI, CMS and NCMS. For  
7 respondents covered by the UEBMI, the contribution was estimated by applying  
8 contribution rates to the earnings of covered workers. Private health insurance  
9 premiums were obtained directly via household interviews. Information about OOP  
10 payments included health care expenditures on outpatient care and prescriptions that  
11 were paid by individuals during 2 weeks prior to the household interview. Inpatient  
12 OOP expenditures during the preceding 12 months were recorded.

### 23 24 **Data analysis**

25  
26 AJL decomposition that measures the RE of health care payments on income  
27 distribution is used to compare the inequality—as measured by the Gini  
28 coefficient—of pre-payment income with that in post-payment incomes[1]. The  
29 redistributive impact can be defined as the reduction in the Gini coefficient caused by  
30 the health care payments [6]. Thus

$$31 \quad RE \equiv G^X - G^{X-P}$$

32  
33 where  $G^X$  and  $G^{X-P}$  are the pre-payment and post-payment Gini coefficients,  
34 respectively, where  $X$  denotes pre-payment income, or more generally, some  
35 measure of ATP, and  $P$  denotes health care payments. AJL demonstrated that the RE  
36 can be decomposed as:

$$37 \quad RE = V - H - R$$

38  
39 The first term, which AJL refer to as V, measures the inequality reduction that would  
40 have obtained if there had been no differential health care payment. The second term,  
41 which AJL refer to as H, measures the extent of classical horizontal inequity—the

1  
2  
3 unequal treatment of equals. The third term, which AJL refer to as R, measures the  
4 extent of reranking in the move from the pre-payment income distribution to the  
5 post-payment income distribution [1]. To distinguish and compute these components,  
6 groups of pre-payment equals are required to be artificially created. This is done by  
7 defining certain pre-payment income intervals, and then labeling all households with  
8 incomes in that range as equals. All households within an interval are attributed the  
9 mean within-interval income,  $x_j$ . V itself can be decomposed into a payment rate  
10 effect and a progressivity effect,  
11  
12  
13  
14  
15  
16  
17  
18  
19

$$V = \left( \frac{g}{1-g} \right) K_E$$

20  
21 with  $g$  the sample average health care payment rate (as a proportion of income), and  
22  $K_E$  is the Kakwani index of payments computed under the assumption of  
23 within-group equality, i.e. that all households in the same (pre-defined) bandwidth of  
24 (equal) pre-payment income everyone pays the same amount (i.e. under horizontal  
25 equity conditions).  
26  
27  
28  
29  
30  
31  
32  
33  
34  
35

36 Horizontal inequity H is measured by the weighted sum of the group (j) specific  
37 post-payment Gini coefficients,  $G_j^{X-P}$ , where weights are given by the product of the  
38 group's population share and its post-payment income share,  $a_j$ .  
39  
40  
41  
42

$$H = \sum_j a_j G_j^{X-P}$$

43  
44 R captures the extent of reranking of households that occurs in the move from  
45 pre-payment to post-payment income distributions. It is measured as the difference  
46 between the post-payment Gini coefficient  $G^{X-P}$  and the post-payment  
47 concentration index  $C^{X-P}$ . The latter differs from the former in that households are  
48 ranked by their pre-payment income, not their post-payment income. If there is no  
49  
50  
51  
52  
53  
54  
55  
56  
57  
58  
59  
60

1  
2  
3 reranking, R is zero.

$$R = G^{X-P} - C^{X-P}$$

4  
5  
6  
7 All in all, the total RE can be decomposed into four components: an average rate  
8 effect (g), the departure-from-proportionality or progressivity effect ( $K_E$ ), a  
9 horizontal inequity effect H and a reranking effect R.  
10  
11  
12

### 13 14 **Results**

15  
16 Decompositions of the RE of health care financing sources are presented in Tables  
17 3–6. The distribution of health care financing sources across equivalent income  
18 deciles, along with the corresponding values of g, V, H, R and RE. V, H, and R is also  
19 presented as the percentage of RE.  
20  
21  
22  
23

#### 24 **RE of urban areas in 2002**

25  
26 In urban areas, payments to health care accounted for 15.70% of the total  
27 household expenditures (Table 3). The health care financing system had a pro-poor  
28 redistribution as its RE value was positive (0.004278). As a proportion of total health  
29 care payments, horizontal inequity (H) accounted for 93.85 percentage points of the  
30 RE, whereas reranking (R) accounts for 165.57 percentage points. That is, the health  
31 care financing system did not treat households with equal household expenditures  
32 equally, and households were also reranked after health care payments. The system  
33 would have been 259.42% more redistributive without differential treatment. In  
34 addition, general taxes were shown slightly pro-rich with a negative RE value  
35 (−0.000084). It would have been 24.68% less redistributive in the absence of  
36 differential treatment, which was entirely determined by horizontal inequity (H). With  
37 regard to public health insurance, which, in 2002, was mainly UEBMI in urban areas,  
38 the RE value was positive (0.000970), indicating that the use of financing through  
39 public insurance contributions was pro-poor. The value of V for public insurance  
40  
41  
42  
43  
44  
45  
46  
47  
48  
49  
50  
51  
52  
53  
54  
55  
56  
57  
58  
59  
60

1  
2  
3 indicated that the extent of the pro-poor redistribution would have been 19.77% more  
4  
5 in the absence of differential treatment, which was determined by horizontal inequity  
6  
7 (H) by 17.84 percentage points and reranking (R) by 1.93 percentage points. Private  
8  
9 health insurance had a pro-rich effect because its RE value was negative (-0.001349).  
10  
11 The pro-rich redistribution would have been 50.60% less without differential  
12  
13 treatment, 28.32 percentage points being due to horizontal inequity and 22.28  
14  
15 percentage points being due to reranking. A much higher degree of differential  
16  
17 treatment occurred in OOP payment—this source would have been 231.53% more  
18  
19 redistributive in the absence of differential treatment, which depends on horizontal  
20  
21 inequity by 79.92 percentage points and reranking by 151.62 percentage points.  
22  
23  
24  
25  
26

27 *<insert table 3 here>*  
28  
29  
30

### 31 **RE of rural areas in 2002**

32  
33 In rural areas, 14.61% of household expenditure was payments to health care (Table  
34  
35 4). RE was negative (-0.004308) for the overall health care financing system,  
36  
37 indicating that it was a pro-rich redistribution. It would have been 411.62% less  
38  
39 redistributive without differential treatment, 113.19 percentage points being due to  
40  
41 horizontal inequity and 298.43 percentage points being due to reranking. In terms of  
42  
43 special financing sources, general taxes showed a regressive structure, the pro-rich  
44  
45 redistribution would have been 15.41% less in the absence of differential treatment,  
46  
47 being entirely due to horizontal inequity (H). RE for public health insurance was  
48  
49 negative (-0.000033) and the redistribution was pro-rich. The redistribution would  
50  
51 have been 215.17% less without differential treatment, 127.93 percentage points  
52  
53 being due to horizontal inequity and 87.24 percentage points due to reranking. RE for  
54  
55  
56  
57  
58  
59  
60

1  
2  
3 private health insurance (-0.000431) and OOP payments (-0.003648) were both  
4 negative, suggesting their redistributions were both pro-rich. The RE of private  
5 insurance would have been 124.18% less redistributive if there had been no  
6 differential treatment, which was determined by reranking (R) by 37.94 percentage  
7 points and horizontal inequity (H) by 86.25 percentage points. The RE of OOP  
8 payments would have been 462.90% less redistributive if there had been no  
9 differential treatment, which was determined by horizontal inequity (H) by 127.71  
10 percentage points and reranking (R) by 335.18 percentage points.  
11  
12  
13  
14  
15  
16  
17  
18  
19  
20  
21

22 <insert table 4 here>  
23  
24  
25

### 26 **RE of urban areas in 2007**

27  
28 In urban areas, payments to health care accounted for 19.30% of household  
29 expenditures (Table 5). The RE value for total health care payments was negative  
30 (-0.017901) and thus the health care financing system was a pro-rich redistribution.  
31 The redistribution would have been 121.70% less in the absence of differential  
32 treatment, 35.50 percentage points being due to horizontal inequity and 86.20  
33 percentage points being due to reranking. With regard to special financing sources,  
34 general taxes were marginally pro-rich redistributive. The distribution would have  
35 been 52.60% less without different treatment, which was entirely determined by  
36 horizontal inequity (H). Public health insurance was a pro-poor redistributive  
37 structure, which would have been 40.92 more without differential treatment,  
38 determining by horizontal inequity by 28.02 percentage points and reranking by 12.91  
39 percentage points. Private health insurance was also a pro-poor redistribution and it  
40 would have been 306.03 percentage points more in the absence of differential  
41  
42  
43  
44  
45  
46  
47  
48  
49  
50  
51  
52  
53  
54  
55  
56



1  
2  
3 treatment. Horizontal inequity (H) accounted for 169.28 percentage points of the RE,  
4  
5 whereas reranking (R) accounted for 136.75 percentage points of the RE. OOP  
6  
7 payments had a pro-rich RE. It would have been 88.42 percentage points less without  
8  
9 differential treatment, 24.83 percentage points being due to horizontal inequity (H)  
10  
11 and 63.59 percentage points being due to reranking.  
12  
13

14  
15  
16 *<insert table 5 here>*  
17  
18  
19

### 20 **RE of rural areas in 2007**

21  
22 In rural areas, 14.98% of household expenditure was payment to health care (Table  
23  
24 6). The RE value for total health care payments was  $-0.015593$  and thus the health  
25  
26 care financing system was a pro-rich redistribution. The redistribution would have  
27  
28 been 113.71% less in the absence of differential treatment, 37.12 percentage points  
29  
30 being due to horizontal inequity and 76.59 percentage points being due to reranking.  
31  
32 With regard to special financing sources, general taxes were slightly pro-rich  
33  
34 redistributive. The redistribution would have been 35.42% less without differential  
35  
36 treatment, which was fully determined by horizontal inequity (H). Public health  
37  
38 insurance was pro-rich redistributive. The redistribution would have been 0.36% less  
39  
40 in the absence of differential treatment, almost being fully due to horizontal inequity  
41  
42 (H). Private health insurance has a pro-rich RE. It would have been 52.01 percentage  
43  
44 points less without differential treatment, 23.13 percentage points being due to  
45  
46 horizontal inequity (H) and 28.88 percentage points being due to reranking (R). OOP  
47  
48 payments were a pro-poor redistribution and would have been 152.92 percentage  
49  
50 points less in the absence of differential treatment, 53.10 percentage points being due  
51  
52 to horizontal inequity and 99.82 percentage points being due to reranking (R).  
53  
54  
55  
56  
57  
58  
59  
60

<insert table 6 here>

## Discussion

In terms of absolute value, in urban areas, horizontal inequity accounted for 93.85 percentage points in 2002, while it accounted for 35.50 percentage points in 2007. In rural areas, horizontal inequity accounted for 113.19 percentage points in 2002, while it accounted for 37.12 percentage points in 2007. These findings show that horizontal inequity decreased over the period 2002–2007. Furthermore, the extent of reranking was also reduced over the same period in both urban and rural areas, indicating that the impact of health care finance on impoverishment was reduced.

The biggest challenge for horizontal equity in China's health care finance originated from OOP payments. OOP payments as fraction of income (g) were far larger than all other health care financing sources. This implied that the RE of total health care payment was largely dominated by OOP payments. Our study has shown that horizontal inequity in OOP payments has been reduced both in urban and rural areas over the period 2002–2007. The horizontal inequity in OOP payments mainly stemmed from the different health conditions and health insurance schemes among individuals with the same income level. As the distribution of health conditions among population was unlikely changed markedly during a relatively short time period, the reduction of horizontal inequity was largely attributable to the reform and establishment of the new health insurance programs. However, the extent of reranking of OOP payments was much larger than other health care payments. It was indicated that the rank order of individuals who financed health care through OOP payments decreased markedly.

1  
2  
3 In 2002, urban public health insurance was UEBMI, and it covered mainly workers  
4 in the public sector. In 2007, UEBMI and URBMI were both in effect, with UEBMI  
5 covering workers in both the public and private sectors, while URBMI covered  
6 citizens who were ineligible to enroll in UEBMI, such as students, the elderly, and the  
7 unemployed. China's public health insurance was managed and run at the city level.  
8 UEBMI premiums were different among cities. This was the main reason for the  
9 horizontal inequity in public health insurance in urban areas in 2002. Excluding this  
10 reason, in 2007, the different financing schemes between UEBMI and URBMI, and  
11 the disparity in financing contribution to UEBMI between public and private sectors,  
12 also resulted in horizontal inequity. This explained why horizontal inequity in urban  
13 public health insurance increased over the period 2002–2007. In 2002, CMS provided  
14 rural public health insurance, covering less than 10% of rural residents. In 2007,  
15 NCMS, covered over 90% of rural residents. Both CMS and NCMS were based on  
16 flat rate contributions. Thus, the horizontal inequity in rural health insurance came  
17 from the different financing contribution among different cities, and came from the  
18 covered and the uncovered. Since almost all rural residents were covered by NCMS in  
19 2007, the horizontal inequity in rural public health insurance was dramatically  
20 decreased over the period. Private health insurance did not play an important role in  
21 China's health insurance reform because the government decided to achieve Universal  
22 Health Coverage through public health insurance. Currently, only about 5% of the  
23 population is enrolled in private health insurance [2]. The insurees purchase different  
24 types of insurance from different insurance companies. Therefore, the horizontal  
25 inequities are comparatively high.

26  
27  
28  
29  
30  
31  
32  
33  
34  
35  
36  
37  
38  
39  
40  
41  
42  
43  
44  
45  
46  
47  
48  
49  
50  
51  
52 Our findings demonstrated that horizontal inequity in general taxes increased from  
53 2002 to 2007, and that horizontal inequity was higher in urban areas than in rural  
54  
55  
56

1  
2  
3 areas. The main income source for households in China was wages. Taxes for  
4  
5 households consisted primarily of personal income tax. Because of economic  
6  
7 development, individuals, especially in urban areas, earned their income in a variety  
8  
9 of sources, and people with the same income levels had a much greater variety of  
10  
11 income compositions than in the past. Different income types were subject to different  
12  
13 tax rates, which resulted in increased horizontal inequity.  
14

15  
16 Despite that horizontal, vertical and reranking effects are usually expressed and  
17  
18 explained as a percentage of the total RE, some results need to be interpreted with  
19  
20 caution. Whilst the horizontal inequity of OOP and total payments in relative terms  
21  
22 reduced over the period 2002–2007, in absolute terms, the horizontal inequity  
23  
24 increased over 2002–2007 in both urban and rural areas. As the horizontal inequity  
25  
26 was measured by the weighted sum of Gini coefficients in each income quintile group  
27  
28 [1, 7], the increase of horizontal inequity in the absolute term indicated a more  
29  
30 inequitable distribution within the income quintile group. Furthermore, RE decreased  
31  
32 both in urban and rural areas from 2002 to 2007 in our study, indicating that the health  
33  
34 care financing system had become more pro-rich over the period. In a previous study  
35  
36 in the same area, Chen et al. had found that the Kakwani index of the total health care  
37  
38 payments decreased over 2002 to 2007 [24]. This is consistent with the finding in the  
39  
40 current study that the vertical equity (V) decreased over 2002 to 2007. We have also  
41  
42 found that the horizontal inequity (H) increased in both urban and rural areas over the  
43  
44 same time period. In addition, the reranking (R) decreased in rural area but increased  
45  
46 in urban area over 2002 to 2007. When considering V, H and R together, RE  
47  
48 decreased in both urban and rural areas. This finding indicated that improving both  
49  
50 vertical and horizontal equity in health care financing system could improve pro-poor  
51  
52 redistribution to a large extent in the study population. However, the equitable vertical  
53  
54  
55  
56  
57  
58  
59  
60

1  
2  
3 and horizontal distribution are hard to achieve simultaneously. Taking NCMS as an  
4  
5 example, a flat rate premium could result in an equitable horizontal distribution, but at  
6  
7 the cost of worsened vertical equity as all insured individuals paid the same premium,  
8  
9 irrespective of their incomes. Therefore, we have to weigh the horizontal equity  
10  
11 against vertical equity in the health care financing system reform. Future work is  
12  
13 merited to investigate the optimal trade-off between horizontal and vertical equity to  
14  
15 achieve a more pro-poor redistribution in the health care financing system.  
16

17  
18 The current study has only examined data from one province in China. It is unlikely  
19  
20 to fully represent the horizontal equity in China's health care financing system.  
21  
22 Studies using national representative data are merited to evaluate the horizontal equity  
23  
24 of the national health insurance reform in China.  
25

## 26 **Conclusions**

27  
28 Overall horizontal inequity in China's total health care finance has decreased  
29  
30 during 2002 to 2007. In addition, OOP payments contributed most in the overall  
31  
32 health care payments and horizontal inequity in OOP payments decreased. These  
33  
34 findings are of important implications for the future health care financing reform:  
35  
36 China's further health insurance reform should target on cost and service coverage to  
37  
38 decrease the impact of OOP payments.  
39  
40  
41  
42  
43

## 44 **Ethics approval and consent to participate**

45  
46 This study was approved by the Academic Research Ethics Committee of Nanjing  
47  
48 Medical University. All procedures were in accordance with the ethical standards of  
49  
50 the Helsinki Declaration. Participants provided informed consent prior to data  
51  
52 collection.  
53

## 54 **Acknowledgements**

1  
2  
3 We thank the National Health and Family Planning Commission, People's Republic of  
4 China for supporting and cooperation; Health and Family Planning Commission of  
5 Heilongjiang province for cooperation and organization in the field data collection.  
6  
7

8  
9 We would also like to thank all study participants for their time to be interviewed.  
10

### 11 **Authors' contributions**

12  
13 ZW led the study; he designed the study, led the data analysis and interpretation. MC  
14 contributed to the study design and wrote the manuscript. XZ analyzed the data and  
15 helped in the writing of the final draft of the manuscript. YG contributed to the study  
16 design and analyzed the data. LS supervised the study, contributed to the study design  
17 and wrote the manuscript. All authors read and approved the final manuscript.  
18  
19  
20  
21  
22  
23

### 24 **Competing interests**

25  
26  
27 None  
28

### 29 **Funding**

30  
31 This study is funded by the National Natural Science Foundation of China (Grant  
32 number: 71503137). LS is supported by a NHMRC Early Career Fellowship  
33 (GNT1139826). The funding bodies were not involved in the design of the study, or  
34 data collection, analysis, and interpretation or in writing the manuscript.  
35  
36  
37  
38  
39

### 40 **Data sharing statement**

41  
42 The datasets used in this study are not publicly available due to a confidentiality  
43 policy, but they are available from the corresponding author on reasonable request.  
44  
45  
46  
47  
48  
49  
50  
51  
52  
53  
54  
55  
56  
57  
58  
59  
60

## References

1. Wagstaff A, van Doorslaer E: **Progressivity, horizontal equity and reranking in health care finance: a decomposition analysis for The Netherlands.** *J HEALTH ECON* 1997, **16**(5):499-516.
2. Chen M, Chen W, Zhao Y: **New evidence on financing equity in China's health care reform - A case study on Gansu province, China.** *BMC HEALTH SERV RES* 2013, **12**(466).
3. Lairson DR, Hindson P, Hauquitz A: **Equity of health care in Australia.** *SOC SCI MED* 1995, **41**(4):475-482.
4. Liu GG, Zhao Z, Cai R, Yamada T, Yamada T: **Equity in health care access to: assessing the urban health insurance reform in China.** *SOC SCI MED* 2002, **55**(10):1779-1794.
5. Asante A, Price J, Hayen A, Jan S, Wiseman V: **Equity in Health Care Financing in Low- and Middle-Income Countries: A Systematic Review of Evidence from Studies Using Benefit and Financing Incidence Analyses.** *PLOS ONE* 2016, **11**(4):e152866.
6. Aronson JR, Johnson P, Lambert P: **Redistributive effect and unequal income tax treatment.** *The Economic Journal* 1994, **104**(423):262-270.
7. Gerdtham UG, Sundberg G: **Redistributive effects of Swedish health care finance.** *Int J Health Plann Manage* 1998, **13**(4):289-306.
8. Bilger M: **Progressivity, horizontal inequality and reranking caused by health system financing: A decomposition analysis for Switzerland.** *J HEALTH*

1  
2  
3  
4  
5  
6  
7  
8  
9  
10  
11  
12  
13  
14  
15  
16  
17  
18  
19  
20  
21  
22  
23  
24  
25  
26  
27  
28  
29  
30  
31  
32  
33  
34  
35  
36  
37  
38  
39  
40  
41  
42  
43  
44  
45  
46  
47  
48  
49  
50  
51  
52  
53  
54  
55  
56  
57  
58  
59  
60

*ECON* 2008, **27**(6):1582-1593.

9. Wagstaff A, Yip W, Lindelow M, Hsiao WC: **CHINA'S HEALTH SYSTEM AND ITS REFORM: A REVIEW OF RECENT STUDIES.** *HEALTH ECON* 2009, **182**(SI):S7-S23.

10. Yip W, Hanson K: **Purchasing health care in China: experiences, opportunities and challenges.** *Advances in health economics and health services research* 2009, **21**:197-218.

11. Yip W, Wagstaff A, Hsiao WC: **ECONOMIC ANALYSIS OF CHINA'S HEALTH CARE SYSTEM: TURNING A NEW PAGE.** *HEALTH ECON* 2009, **18**:S3-S6.

12. Eggleston K, Yip W: **Hospital competition under regulated prices: application to urban health sector reforms in China.** *International journal of health care finance and economics* 2004, **4**(4):343-368.

13. Wang H, Yip W, Zhang LC, Wang LS, Hsiao W: **Community-based health insurance in poor rural China: the distribution of net benefits.** *HEALTH POLICY PLANN* 2005, **20**(6):366-374.

14. Zhou C, Long Q, Chen J, Xiang L, Li Q, Tang S, Huang F, Sun Q, Lucas H, Huan S: **The effect of NCMS on catastrophic health expenditure and impoverishment from tuberculosis care in China.** *Int J Equity Health* 2016, **15**(1):172.

15. Health CSMO: **An analysis report of the third national health services survey.** In. Beijing: Chinese Union Medical University Press; 2004.



- 1  
2  
3  
4 16. Wang L, Wang A, Zhou D, FitzGerald G, Ye D, Jiang Q: **An Empirical Analysis**  
5  
6 **of Rural-Urban Differences in Out-Of-Pocket Health Expenditures in a**  
7  
8 **Low-Income Society of China.** *PLOS ONE* 2016, **11**(5):e154563.  
9
- 10  
11 17. Center NHDR: **China National Health Accounts Report 2015.** In. Beijing:  
12  
13 National Health and Family Planning Commission of the People's Republic of China;  
14  
15 2016.  
16
- 17  
18 18. Wang L, Wang A, FitzGerald G, Si L, Jiang Q, Ye D: **Who benefited from the**  
19  
20 **New Rural Cooperative Medical System in China? A case study on Anhui**  
21  
22 **Province.** *BMC HEALTH SERVICES* 2016, **16**:195.  
23
- 24  
25 19. Yip WC, Hsiao WC, Chen W, Hu S, Ma J, Maynard A: **Early appraisal of**  
26  
27 **China's huge and complex health-care reforms.** *LANCET* 2012,  
28  
29 **379**(9818):833-842.  
30
- 31  
32 20. Yip W, Hsiao WC: **Market watch - The Chinese health system at a crossroads.**  
33  
34 *HEALTH AFFAIR* 2008, **27**(2):460-468.  
35
- 36  
37 21. Health CSMO: **An analysis report of the fourth national health services**  
38  
39 **survey.** In. Beijing: Chinese Union Medical University Press; 2009.  
40
- 41  
42 22. China NBOS: <http://data.stats.gov.cn/easyquery.htm?cn=E0103>. In., vol. 2017;  
43  
44 2017.  
45
- 46  
47 23. Wilde PE: **The analysis of household surveys: A microeconomic approach**  
48  
49 **to development policy.** *AM J AGR ECON* 2000, **82**(3):780-782.  
50
- 51  
52 24. Chen M, Zhao Y, Si L: **Who Pays for Health Care in China? The Case of**  
53  
54 **Heilongjiang Province.** *PLOS ONE* 2014, **9**(10):e108867.  
55  
56

1  
2  
3  
4  
5  
6  
7  
8  
9  
10  
11  
12  
13  
14  
15  
16  
17  
18  
19  
20  
21  
22  
23  
24  
25  
26  
27  
28  
29  
30  
31  
32  
33  
34  
35  
36  
37  
38  
39  
40  
41  
42  
43  
44  
45  
46  
47  
48  
49  
50  
51  
52  
53  
54  
55  
56  
57  
58  
59  
60

For peer review only

1  
2  
3 **Tables**  
4

5 **Table 1**

6 Descriptive statistics and socioeconomic characteristics for the urban sample

| Variable                            | 2002 |          |           | 2007 |          |           |
|-------------------------------------|------|----------|-----------|------|----------|-----------|
|                                     | Obs  | Mean     | Std. dev. | Obs  | Mean     | Std. dev. |
| Female                              | 2613 | 0.50     |           | 3140 | 0.51     |           |
| Age                                 | 5265 | 38.86    | 18.96     | 6188 | 43.25    | 19.11     |
| 0-14                                | 699  | 8.41     | 4.14      | 579  | 8.13     | 4.11      |
| 14-59                               | 3738 | 38.07    | 11.41     | 4332 | 40.36    | 11.74     |
| 60+                                 | 828  | 68.14    | 6.43      | 1277 | 68.99    | 6.65      |
| Average number of household members | 1923 | 2.74     | 0.91      | 2433 | 2.67     | 0.97      |
| Equivalent household income         | 1923 | 6673.96  | 8536.51   | 2433 | 8113.18  | 6698.25   |
| 1st quintile                        | 383  | 1632.37  | 388.58    | 485  | 3106.48  | 684.43    |
| 2nd quintile                        | 385  | 2853.21  | 352.19    | 489  | 4878.06  | 431.32    |
| 3rd quintile                        | 385  | 4230.77  | 481.25    | 486  | 6556.05  | 554.44    |
| 4th quintile                        | 385  | 6515.92  | 900.16    | 487  | 8913.53  | 813.41    |
| 5th quintile                        | 385  | 18111.36 | 13648.11  | 486  | 17119.82 | 10167.41  |
| Health insurance                    |      |          |           |      |          |           |
| None                                | 3120 | 59.26    |           | 2909 | 47.01    |           |
| Any                                 | 2145 | 40.74    |           | 3279 | 52.99    |           |
| Public health insurance types       | 1922 | 36.51    |           | 2988 | 48.29    |           |
| UEBMI                               | 1374 | 26.10    |           | 2100 | 33.94    |           |
| URBMI                               | 0    | 0.00     |           | 273  | 4.41     |           |
| CMS (NCMS)                          | 6    | 0.11     |           | 50   | 0.81     |           |
| Other insurance                     | 542  | 10.29    |           | 565  | 9.13     |           |
| None                                | 3343 | 63.49    |           | 3200 | 51.71    |           |
| Private health insurance types      | 359  | 6.82     |           | 297  | 4.80     |           |

7  
8  
9  
10  
11  
12  
13  
14  
15  
16  
17  
18  
19  
20  
21  
22  
23  
24  
25  
26  
27  
28  
29  
30  
31  
32  
33  
34  
35  
36  
37  
38  
39  
40 Source: Authors' calculations from 2003–2008 NHSS data.  
41  
42  
43  
44  
45  
46  
47  
48  
49  
50  
51  
52  
53  
54  
55  
56  
57  
58  
59  
60

**Table 2**  
Descriptive statistics and socioeconomic characteristics for the rural sample

| Variable                            | 2002 |         |         | 2007 |          |         |
|-------------------------------------|------|---------|---------|------|----------|---------|
|                                     | Obs  | Mean    | Std dev | Obs  | Mean     | Std dev |
| Female                              | 3063 | 0.49    |         | 4808 | 0.50     |         |
| Age                                 | 6307 | 33.39   | 18.02   | 9638 | 36.57    | 19.17   |
| 0-14                                | 1133 | 8.22    | 4.42    | 1497 | 7.33     | 4.22    |
| 14-59                               | 4704 | 35.92   | 11.91   | 7080 | 37.95    | 12.33   |
| 60+                                 | 470  | 68.70   | 7.06    | 1061 | 68.57    | 7.46    |
| Average number of household members | 1918 | 3.29    | 1.12    | 3097 | 3.25     | 1.16    |
| Equivalent household income         | 1918 | 3381.07 | 2772.73 | 3097 | 6160.81  | 4470.30 |
| 1st quintile                        | 383  | 1290.94 | 293.39  | 619  | 2691.81  | 551.94  |
| 2nd quintile                        | 385  | 2013.65 | 193.44  | 620  | 4040.15  | 310.04  |
| 3rd quintile                        | 383  | 2706.09 | 227.53  | 620  | 5218.73  | 364.09  |
| 4th quintile                        | 384  | 3674.15 | 378.62  | 619  | 6790.10  | 588.12  |
| 5th quintile                        | 383  | 7226.90 | 4077.39 | 619  | 12068.21 | 6813.69 |
| Health insurance                    |      |         |         |      |          |         |
| None                                | 5311 | 84.21   |         | 905  | 9.39     |         |
| Any                                 | 996  | 15.79   |         | 8733 | 90.61    |         |
| Public health insurance types       |      |         |         |      |          |         |
| UEBMI                               | 71   | 1.13    |         | 34   | 0.35     |         |
| URBMI                               | 0    | 0.00    |         | 4    | 0.04     |         |
| CMS (NCMS)                          | 347  | 5.50    |         | 8401 | 87.16    |         |
| Other insurance                     | 179  | 2.84    |         | 188  | 1.95     |         |
| None                                | 5710 | 90.53   |         | 1012 | 10.50    |         |
| Private health insurance types      | 402  | 6.37    |         | 773  | 8.02     |         |

Source: Authors' calculations from 2003–2008 NHSS data.

**Table 3**

Decomposition of the redistributive effects of the Chinese urban health care financing system in 2002

| Decile       | income  | General taxes | Public health insurance | Private health insurance | OOP      | Total payments |
|--------------|---------|---------------|-------------------------|--------------------------|----------|----------------|
| 1 (poorest)  | 1.97%   | 2.07%         | 0.52%                   | 1.01%                    | 1.53%    | 1.44%          |
| 2            | 2.95%   | 3.12%         | 0.81%                   | 4.92%                    | 2.19%    | 2.18%          |
| 3            | 3.86%   | 4.08%         | 1.33%                   | 6.00%                    | 2.83%    | 2.86%          |
| 4            | 4.76%   | 4.97%         | 2.83%                   | 3.65%                    | 3.94%    | 3.92%          |
| 5            | 5.74%   | 5.89%         | 3.82%                   | 4.54%                    | 5.28%    | 5.12%          |
| 6            | 6.98%   | 7.22%         | 4.91%                   | 6.45%                    | 5.87%    | 5.95%          |
| 7            | 8.64%   | 9.09%         | 8.40%                   | 14.02%                   | 6.91%    | 7.70%          |
| 8            | 10.86%  | 11.33%        | 17.03%                  | 9.31%                    | 8.70%    | 10.60%         |
| 9            | 14.60%  | 14.85%        | 34.95%                  | 28.02%                   | 13.24%   | 17.58%         |
| 10 (richest) | 39.64%  | 37.38%        | 25.40%                  | 22.10%                   | 49.51%   | 42.66%         |
| total        | 100.00% | 100.00%       | 100.00%                 | 100.00%                  | 100.00%  | 100.00%        |
| g            |         | 0.003789      | 0.011082                | 0.008820                 | 0.133309 | 0.157001       |
| V            |         | -0.000063     | 0.001162                | -0.000666                | 0.014464 | 0.015376       |
| H            |         | 0.000021      | 0.000173                | 0.000382                 | 0.003487 | 0.004015       |
| R            |         | 0.000000      | 0.000019                | 0.000301                 | 0.006615 | 0.007083       |
| RE           |         | -0.000084     | 0.000970                | -0.001349                | 0.004363 | 0.004278       |
| RE / RE      |         | 100.00%       | 100.00%                 | 100.00%                  | 100.00%  | 100.00%        |
| V / RE       |         | 75.32%        | 119.77%                 | 49.40%                   | 331.53%  | 359.42%        |
| H / RE       |         | -24.68%       | 17.84%                  | -28.32%                  | 79.92%   | 93.85%         |
| R / RE       |         | 0.00%         | 1.93%                   | -22.28%                  | 151.62%  | 165.57%        |

g: Payments as fraction of income

V: Vertical effect

H: Horizontal inequity

R: Reranking

RE: Redistributive effect

**Table 4**

Decomposition of redistributive effects of Chinese rural health care financing system in 2002

| Decile       | income  | General taxes | Public health insurance | Private health insurance | OOP       | Total payments |
|--------------|---------|---------------|-------------------------|--------------------------|-----------|----------------|
| 1 (poorest)  | 3.09%   | 3.43%         | 1.35%                   | 0.89%                    | 2.17%     | 2.22%          |
| 2            | 4.53%   | 4.80%         | 1.46%                   | 3.23%                    | 4.43%     | 3.96%          |
| 3            | 5.46%   | 5.86%         | 3.26%                   | 3.35%                    | 4.58%     | 4.55%          |
| 4            | 6.46%   | 6.86%         | 6.37%                   | 4.59%                    | 5.34%     | 5.76%          |
| 5            | 7.38%   | 7.75%         | 14.62%                  | 11.23%                   | 6.07%     | 7.95%          |
| 6            | 8.59%   | 8.74%         | 13.18%                  | 10.80%                   | 8.90%     | 9.65%          |
| 7            | 9.93%   | 10.29%        | 8.46%                   | 8.14%                    | 7.91%     | 8.42%          |
| 8            | 11.81%  | 11.73%        | 12.11%                  | 20.12%                   | 12.55%    | 12.51%         |
| 9            | 14.97%  | 15.08%        | 7.19%                   | 17.32%                   | 13.22%    | 12.60%         |
| 10 (richest) | 27.78%  | 25.46%        | 31.99%                  | 20.33%                   | 34.83%    | 32.39%         |
| total        | 100.00% | 100.00%       | 100.00%                 | 100.00%                  | 100.00%   | 100.00%        |
| g            |         | 0.003705      | 0.001190                | 0.003403                 | 0.137787  | 0.146085       |
| V            |         | -0.000094     | 0.000038                | 0.000104                 | 0.013238  | 0.013424       |
| H            |         | 0.000017      | 0.000043                | 0.000163                 | 0.004659  | 0.004876       |
| R            |         | 0.000000      | 0.000029                | 0.000371                 | 0.012227  | 0.012856       |
| RE           |         | -0.000111     | -0.000033               | -0.000431                | -0.003648 | -0.004308      |
| RE / RE      |         | 100.00%       | 100.00%                 | 100.00%                  | 100.00%   | 100.00%        |
| V / RE       |         | 84.58%        | -115.17%                | -24.18%                  | -362.90%  | -311.62%       |
| H / RE       |         | -15.41%       | -127.93%                | -37.94%                  | -127.71%  | -113.19%       |
| R / RE       |         | 0.00%         | -87.24%                 | -86.25%                  | -335.18%  | -298.43%       |

g: Payments as fraction of income

V: Vertical effect

H: Horizontal inequity

R: Reranking

RE: Redistributive effect

**Table 5**  
Decomposition of redistributive effects of Chinese urban health care financing system in 2007

| Decile       | income  | General taxes | Public insurance contributions | Private insurance premiums | OOP       | Total payments |
|--------------|---------|---------------|--------------------------------|----------------------------|-----------|----------------|
| 1 (poorest)  | 3.14%   | 3.49%         | 1.05%                          | 5.17%                      | 2.68%     | 2.59%          |
| 2            | 4.52%   | 4.80%         | 2.36%                          | 2.82%                      | 4.16%     | 3.85%          |
| 3            | 5.55%   | 5.66%         | 4.07%                          | 4.49%                      | 5.91%     | 5.37%          |
| 4            | 6.49%   | 6.59%         | 5.30%                          | 6.46%                      | 6.75%     | 6.36%          |
| 5            | 7.47%   | 7.46%         | 6.82%                          | 5.56%                      | 8.02%     | 7.51%          |
| 6            | 8.66%   | 8.57%         | 9.01%                          | 4.27%                      | 9.10%     | 8.77%          |
| 7            | 10.16%  | 9.95%         | 10.59%                         | 10.31%                     | 11.43%    | 10.83%         |
| 8            | 11.82%  | 11.48%        | 12.68%                         | 15.70%                     | 13.55%    | 12.92%         |
| 9            | 14.54%  | 14.62%        | 17.35%                         | 16.01%                     | 13.35%    | 14.70%         |
| 10 (richest) | 27.66%  | 27.39%        | 30.77%                         | 29.20%                     | 25.04%    | 27.11%         |
| total        | 100.00% | 100.00%       | 100.00%                        | 100.00%                    | 100.00%   | 100.00%        |
| g            |         | 0.004710      | 0.045590                       | 0.008282                   | 0.134454  | 0.193035       |
| V            |         | -0.000022     | 0.005007                       | 0.000428                   | -0.002364 | 0.003885       |
| H            |         | 0.000024      | 0.000995                       | 0.000352                   | 0.005067  | 0.006355       |
| R            |         | 0.000000      | 0.000459                       | 0.000284                   | 0.012975  | 0.015431       |
| RE           |         | -0.000046     | 0.003553                       | -0.000208                  | -0.020406 | -0.017901      |
| RE / RE      |         | 100.00%       | 100.00%                        | 100.00%                    | 100.00%   | 100.00%        |
| V / RE       |         | 47.40%        | 140.92%                        | -206.03%                   | 11.58%    | -21.70%        |
| H / RE       |         | -52.60%       | 28.02%                         | -169.28%                   | -24.83%   | -35.50%        |
| R / RE       |         | 0.00%         | 12.91%                         | -136.75%                   | -63.59%   | -86.20%        |

g: Payments as fraction of income

V: Vertical effect

H: Horizontal inequity

R: Reranking

RE: Redistributive effect

**Table 6**

Decomposition of redistributive effects of Chinese rural health care financing system in 2007

| Decile       | income  | General taxes | Public insurance contributions | Private insurance premiums | OOP       | Total payments |
|--------------|---------|---------------|--------------------------------|----------------------------|-----------|----------------|
| 1 (poorest)  | 3.63%   | 3.75%         | 11.08%                         | 4.30%                      | 3.36%     | 5.29           |
| 2            | 5.10%   | 5.20%         | 9.74%                          | 10.25%                     | 4.97%     | 6.33           |
| 3            | 6.13%   | 6.27%         | 9.70%                          | 5.94%                      | 5.81%     | 6.84           |
| 4            | 6.97%   | 7.04%         | 10.05%                         | 10.28%                     | 7.15%     | 7.92           |
| 5            | 7.97%   | 8.08%         | 9.74%                          | 9.46%                      | 7.77%     | 8.37           |
| 6            | 8.98%   | 9.19%         | 9.59%                          | 8.00%                      | 7.94%     | 8.64           |
| 7            | 10.18%  | 10.43%        | 10.62%                         | 10.08%                     | 9.06%     | 9.80           |
| 8            | 11.84%  | 11.92%        | 10.08%                         | 12.33%                     | 11.25%    | 11.18          |
| 9            | 14.45%  | 14.25%        | 10.37%                         | 9.58%                      | 15.62%    | 13.84          |
| 10 (richest) | 24.74%  | 23.86%        | 9.03%                          | 19.78%                     | 27.06%    | 21.79          |
| total        | 100.00% | 100.00%       | 100.00%                        | 100.00%                    | 100.00%   | 100.00%        |
| g            |         | 0.004744      | 0.002764                       | 0.012405                   | 0.129908  | 0.149821       |
| V            |         | -0.000035     | -0.000864                      | -0.001599                  | 0.004933  | 0.002138       |
| H            |         | 0.000019      | 0.000003                       | 0.000770                   | 0.004951  | 0.005788       |
| R            |         | 0.000000      | 0.000000                       | 0.000962                   | 0.009306  | 0.011943       |
| RE           |         | -0.000053     | -0.000867                      | -0.003331                  | -0.009323 | -0.015593      |
| RE / RE      |         | 100.00%       | 100.00%                        | 100.00%                    | 100.00%   | 100.00%        |
| V / RE       |         | 64.58%        | 99.64%                         | 47.99%                     | -52.92%   | -13.71%        |
| H / RE       |         | -35.42%       | -0.36%                         | -23.13%                    | -53.10%   | -37.12%        |
| R / RE       |         | 0.00%         | 0.00%                          | -28.88%                    | -99.82%   | -76.59%        |

g: Payments as fraction of income

V: Vertical effect

H: Horizontal inequity

R: Reranking

RE: Redistributive effect



**STROBE 2007 (v4) Statement—Checklist of items that should be included in reports of *cross-sectional studies***

| Section/Topic                | Item # | Recommendation                                                                                                                                                                       | Reported on page # |
|------------------------------|--------|--------------------------------------------------------------------------------------------------------------------------------------------------------------------------------------|--------------------|
| Title and abstract           | 1      | (a) Indicate the study’s design with a commonly used term in the title or the abstract                                                                                               | 2                  |
|                              |        | (b) Provide in the abstract an informative and balanced summary of what was done and what was found                                                                                  | 2                  |
| <b>Introduction</b>          |        |                                                                                                                                                                                      |                    |
| Background/rationale         | 2      | Explain the scientific background and rationale for the investigation being reported                                                                                                 | 4                  |
| Objectives                   | 3      | State specific objectives, including any prespecified hypotheses                                                                                                                     | 6                  |
| <b>Methods</b>               |        |                                                                                                                                                                                      |                    |
| Study design                 | 4      | Present key elements of study design early in the paper                                                                                                                              | 8                  |
| Setting                      | 5      | Describe the setting, locations, and relevant dates, including periods of recruitment, exposure, follow-up, and data collection                                                      | 8                  |
| Participants                 | 6      | (a) Give the eligibility criteria, and the sources and methods of selection of participants                                                                                          | 8                  |
| Variables                    | 7      | Clearly define all outcomes, exposures, predictors, potential confounders, and effect modifiers. Give diagnostic criteria, if applicable                                             | 9                  |
| Data sources/<br>measurement | 8*     | For each variable of interest, give sources of data and details of methods of assessment (measurement). Describe comparability of assessment methods if there is more than one group | 9                  |
| Bias                         | 9      | Describe any efforts to address potential sources of bias                                                                                                                            | 9, 10              |
| Study size                   | 10     | Explain how the study size was arrived at                                                                                                                                            | 8                  |
| Quantitative variables       | 11     | Explain how quantitative variables were handled in the analyses. If applicable, describe which groupings were chosen and why                                                         | 10, 11             |
| Statistical methods          | 12     | (a) Describe all statistical methods, including those used to control for confounding                                                                                                | 10, 11             |
|                              |        | (b) Describe any methods used to examine subgroups and interactions                                                                                                                  | 10                 |
|                              |        | (c) Explain how missing data were addressed                                                                                                                                          | 11                 |
|                              |        | (d) If applicable, describe analytical methods taking account of sampling strategy                                                                                                   | N/A                |
|                              |        | (e) Describe any sensitivity analyses                                                                                                                                                | N/A                |
| <b>Results</b>               |        |                                                                                                                                                                                      |                    |
| Participants                 | 13*    | (a) Report numbers of individuals at each stage of study—eg numbers potentially eligible, examined for eligibility, confirmed                                                        | 8                  |

|                          |     |                                                                                                                                                                                                              |                |
|--------------------------|-----|--------------------------------------------------------------------------------------------------------------------------------------------------------------------------------------------------------------|----------------|
|                          |     | eligible, included in the study, completing follow-up, and analysed                                                                                                                                          |                |
|                          |     | (b) Give reasons for non-participation at each stage                                                                                                                                                         | N/A            |
|                          |     | (c) Consider use of a flow diagram                                                                                                                                                                           | N/A            |
| Descriptive data         | 14* | (a) Give characteristics of study participants (eg demographic, clinical, social) and information on exposures and potential confounders                                                                     | 9, 10          |
|                          |     | (b) Indicate number of participants with missing data for each variable of interest                                                                                                                          | N/A            |
| Outcome data             | 15* | Report numbers of outcome events or summary measures                                                                                                                                                         | 12             |
| Main results             | 16  | (a) Give unadjusted estimates and, if applicable, confounder-adjusted estimates and their precision (eg, 95% confidence interval). Make clear which confounders were adjusted for and why they were included | 26, 27, 28, 29 |
|                          |     | (b) Report category boundaries when continuous variables were categorized                                                                                                                                    | 26, 27, 28, 29 |
|                          |     | (c) If relevant, consider translating estimates of relative risk into absolute risk for a meaningful time period                                                                                             | N/A            |
| Other analyses           | 17  | Report other analyses done—eg analyses of subgroups and interactions, and sensitivity analyses                                                                                                               | N/A            |
| <b>Discussion</b>        |     |                                                                                                                                                                                                              |                |
| Key results              | 18  | Summarise key results with reference to study objectives                                                                                                                                                     | 16             |
| Limitations              | 19  | Discuss limitations of the study, taking into account sources of potential bias or imprecision. Discuss both direction and magnitude of any potential bias                                                   | 18, 19         |
| Interpretation           | 20  | Give a cautious overall interpretation of results considering objectives, limitations, multiplicity of analyses, results from similar studies, and other relevant evidence                                   | 19             |
| Generalisability         | 21  | Discuss the generalisability (external validity) of the study results                                                                                                                                        | 19             |
| <b>Other information</b> |     |                                                                                                                                                                                                              |                |
| Funding                  | 22  | Give the source of funding and the role of the funders for the present study and, if applicable, for the original study on which the present article is based                                                | 20             |

\*Give information separately for cases and controls in case-control studies and, if applicable, for exposed and unexposed groups in cohort and cross-sectional studies.

**Note:** An Explanation and Elaboration article discusses each checklist item and gives methodological background and published examples of transparent reporting. The STROBE checklist is best used in conjunction with this article (freely available on the Web sites of PLoS Medicine at <http://www.plosmedicine.org/>, Annals of Internal Medicine at <http://www.annals.org/>, and Epidemiology at <http://www.epidem.com/>). Information on the STROBE Initiative is available at [www.strobe-statement.org](http://www.strobe-statement.org).

# BMJ Open

## Did expansion of health insurance coverage reduce horizontal inequity in health care finance? A decomposition analysis for China

|                                 |                                                                                                                                                                                                                                                                                                                                                                                                                                                                                                                                        |
|---------------------------------|----------------------------------------------------------------------------------------------------------------------------------------------------------------------------------------------------------------------------------------------------------------------------------------------------------------------------------------------------------------------------------------------------------------------------------------------------------------------------------------------------------------------------------------|
| Journal:                        | <i>BMJ Open</i>                                                                                                                                                                                                                                                                                                                                                                                                                                                                                                                        |
| Manuscript ID                   | bmjopen-2018-025184.R1                                                                                                                                                                                                                                                                                                                                                                                                                                                                                                                 |
| Article Type:                   | Research                                                                                                                                                                                                                                                                                                                                                                                                                                                                                                                               |
| Date Submitted by the Author:   | 27-Nov-2018                                                                                                                                                                                                                                                                                                                                                                                                                                                                                                                            |
| Complete List of Authors:       | Wang, Zhonghua ; Nanjing Medical University, School of Health Policy and Management<br>Zhou, Xue; Mudanjiang Medical University, Institute of Health Management<br>Gao, Yukuan; Nanjing Medical University, School of Health Policy and Management<br>Chen, Mingsheng; Nanjing Medical University, School of Health Policy and Management<br>Palmer, Andrew; University of Tasmania, Menzies Institute for Medical Research; University of Tasmania,<br>Si, Lei; University of New South Wales, The George Institute for Global Health |
| <b>Primary Subject Heading</b>: | Health services research                                                                                                                                                                                                                                                                                                                                                                                                                                                                                                               |
| Secondary Subject Heading:      | Health services research                                                                                                                                                                                                                                                                                                                                                                                                                                                                                                               |
| Keywords:                       | horizontal inequity, redistributive effect, health insurance, payment, financing                                                                                                                                                                                                                                                                                                                                                                                                                                                       |
|                                 |                                                                                                                                                                                                                                                                                                                                                                                                                                                                                                                                        |

SCHOLARONE™  
Manuscripts

1  
2  
3 1 **Did expansion of health insurance coverage reduce horizontal inequity in health**  
4  
5 2 **care finance? A decomposition analysis for China**  
6  
7  
8 3

9  
10 4 **Authors and affiliations**  
11

12 5 Zhonghua Wang<sup>1,2</sup>, Xue Zhou<sup>3</sup>, Yukuan Gao<sup>1</sup>, Mingsheng Chen<sup>1,2,\*</sup>, Andrew J.  
13  
14 6 Palmer<sup>4,5</sup>, Lei Si<sup>6</sup>

15  
16  
17 7 <sup>1</sup> School of Health Policy & Management, Nanjing Medical University, 211166  
18  
19 8 Nanjing, China

20  
21 9 <sup>2</sup> Creative Health Policy Research Group, Nanjing Medical University, 211166  
22  
23 10 Nanjing, China

24  
25  
26 11 <sup>3</sup> Institute of Health Management, Mudanjiang Medical University, Mudanjiang,  
27  
28 12 China

29  
30 13 <sup>4</sup> Menzies Institute for Medical Research, University of Tasmania, Hobart, Australia

31  
32  
33 14 <sup>5</sup> Centre for Health Policy, School of Population and Global Health, University of  
34  
35 15 Melbourne, Melbourne, Australia

36  
37 16 <sup>6</sup> The George Institute for Global Health, University of New South Wales,  
38  
39 17 Kensington, NSW, 2042, Australia

40  
41  
42 18 **\* Correspondence to**

43  
44 19 Mingsheng Chen, School of Health Policy & Management, Nanjing Medical  
45  
46 20 University, 101 Longmian Avenue, Jiangning District, 211166 Nanjing, China. Email:  
47  
48 21 [cms@njmu.edu.cn](mailto:cms@njmu.edu.cn). Telephone and fax number: +81 025 86868507  
49  
50

51 22  
52  
53  
54  
55  
56  
57  
58  
59  
60

1  
2  
3 **1 Abstract**  
4

5 **2 Objectives** ‘Horizontal inequity’ in health care finance occurs when people with  
6  
7 equal income contribute unequally to health care payments. Prior research is lacking  
8  
9 on horizontal inequity in China. Accordingly, this study set out to examine horizontal  
10  
11 inequity in the Chinese health care financing system in 2002 and 2007 through two  
12  
13 rounds of national household health surveys.  
14  
15

16  
17 **3 Design** Two rounds of cross-sectional study.  
18

19 **4 Setting** Heilongjiang Province, China.  
20

21 **5 Participants** Adopting a multi-stage stratified random sampling, 3,841 households  
22  
23 with 11,572 individuals in 2003 and 5530 households with 15,817 individuals in 2008  
24  
25 were selected.  
26  
27

28 **6 Methods** The decomposition method of Aronson *et al.* (1994) was used in the present  
29  
30 study to measure the redistributive effects and horizontal inequity in health care  
31  
32 finance.  
33  
34

35 **7 Findings** Over the period 2002–2007, the absolute value of horizontal inequity in  
36  
37 total health care payments decreased from 93.85 percentage points to 35.50  
38  
39 percentage points in urban areas, and from 113.19 percentage points to 37.12  
40  
41 percentage points in rural areas. For public health insurance, it increased from 17.84  
42  
43 percentage points to 28.02 percentage points in urban areas, and decreased from  
44  
45 127.93 percentage points to 0.36 percentage points in rural areas. Horizontal inequity  
46  
47 in out-of-pocket payments decreased from 79.92 percentage points to 24.83  
48  
49 percentage points in urban areas, and from 127.71 percentage points to 53.10  
50  
51 percentage points in rural areas.  
52  
53

54 **8 Conclusions** Our results show that horizontal inequity in total health care financing  
55  
56 decreased over the period 2002–2007 in China. In addition, out-of-pocket payments  
57  
58  
59  
60

1 contributed most to the extent of horizontal inequity, which were reduced both in  
2 urban and rural areas over the period 2002–2007.

3  
4 **Keywords:** horizontal inequity; redistributive effect; health insurance; payment;  
5 financing

#### 6 **Strengths and limitations of this study**

- 7 ● This study was the first to evaluate the horizontal inequity in health care  
8 finance in China.
- 9 ● The study was the first to explore the relationship between vertical and  
10 horizontal equity in health care financing system in China.
- 11 ● Our study demonstrates that horizontal inequity also contributed to the  
12 overall inequity in health care finance, and that it should be  
13 simultaneously considered with vertical inequity when renovating the  
14 health care financing system.

## 1 INTRODUCTION

2 Apart from securing access to health care, contributions toward financing health  
3 care may redistribute the disposable income of households. This redistribution can be  
4 assessed on vertical and horizontal levels: ‘vertical redistribution’ occurs when health  
5 care payments are disproportionately related to ‘ability to pay’ (ATP); ‘horizontal  
6 redistribution’ occurs when people with equal ATP contribute unequally to health  
7 care payments. Vertical redistribution and horizontal redistribution are generally  
8 defined as a ‘redistributive effect’ (RE). An RE can be quantitatively decomposed  
9 into three aspects: ‘vertical’, ‘horizontal’ and ‘reranking’. The vertical effect shows  
10 how households with different incomes are affected by the financing, the horizontal  
11 effect measures the inequity generated among households with the same pre-financing  
12 income, while the reranking effect quantifies the change in the order of income  
13 distribution.

14 In the literature, a considerable number of studies have been published on vertical  
15 equity.<sup>1-5</sup> Horizontal inequity and reranking, by contrast, were not reported in great  
16 detail until 1994. In that year, Aronson, Johnson and Lambert (hereafter, AJL)  
17 provided a decomposition method to measure the RE of income tax through pre- and  
18 post-Gini coefficients, and revealed the separate contributions to the RE of income tax  
19 of (a) the effective schedule (the ‘vertical effect’), (b) the unequal treatment of equals  
20 arising from departures from this effective schedule (the ‘horizontal effect’) and (c)  
21 the reranking of unequals as a result of such departures (the ‘reranking effect’).<sup>6</sup>  
22 Later, in 1997, Wagstaff and van Doorslaer applied the AJL method to decompose the  
23 change in income inequality caused by health care finance into vertical, horizontal  
24 and reranking effects in the Netherlands, with each effect corresponding to a different  
25 dimension of equity: vertical equity, horizontal inequity and reranking.<sup>7</sup> By

1  
2  
3 1 simultaneously revealing these three different dimensions of equity, the AJL  
4  
5 2 decomposition constitutes a useful tool for assessing the fairness of health care  
6  
7 3 financing. Consequently, horizontal inequity has since been measured and evaluated  
8  
9  
10 4 in empirical studies using the AJL decomposition method. The findings of these  
11  
12 5 studies indicated that factors such as social status, geographic distribution,  
13  
14 6 employment type, insurance type, income composition, urban–rural classification,  
15  
16 7 health condition, and race or ethnicity may contribute to horizontal inequity and  
17  
18 8 reranking.<sup>7-9</sup> However, only three papers have conducted empirical evaluations of  
19  
20 9 horizontal inequity in health care finance – for the Netherlands, Switzerland, and  
21  
22 10 Sweden, respectively.<sup>7-9</sup> Moreover, until now, no such empirical assessments have  
23  
24 11 been conducted in China. Since China launched new and extended the established  
25  
26 12 health insurance schemes, a greater proportion of the population has been covered by  
27  
28 13 health insurance. However, the impact on horizontal inequity in health care finance is  
29  
30 14 uncertain. Little is known about the extent of horizontal inequity in health care  
31  
32 15 finance during the reform of China’s health care insurance in the past decades.

33  
34  
35  
36  
37 16 China has established new types of health insurance since 1998. Health insurance  
38  
39 17 coverage has been expanded to include individuals with different socioeconomic  
40  
41 18 statuses. In each socioeconomic group, individuals with diverse social statuses,  
42  
43 19 urban–rural classifications, and geographic access to health care joined health  
44  
45 20 insurance schemes. Until recently, though, there has been no reliable evidence with  
46  
47 21 which to evaluate whether China’s expansion of health insurance coverage has been  
48  
49 22 successful in reducing horizontal inequity in health care finance. The present study  
50  
51 23 examines the RE and horizontal inequity in the Chinese health care financing system  
52  
53 24 in 2002 and 2007 for four different sources of financing; namely, general taxes, public  
54  
55 25 health insurance, private health insurance and out-of-pocket (OOP) payments.  
56  
57  
58  
59  
60



1 The remainder of the paper proceeds as follows: Section 2 provides a brief  
2 overview of Chinese health insurance reform. Section 3 outlines our data sources and  
3 describes the computational methods used in this study. Section 4 presents the  
4 findings of the study, and delineates how empirical results in different financing  
5 sources, areas and times may be compared. Finally, Sections 5 and 6 discuss the  
6 empirical results and attempt to draw some conclusions in relation to broad lessons  
7 from the Chinese experience.

## 8 **CHINA'S HEALTH INSURANCE REFORM**

9 Influenced by social and economic transitions since the early 1980s, China's health  
10 care system was reformed to transit from one based on a planned economic model to a  
11 market-based system. Government health input rapidly decreased with the  
12 decentralization of health care financing.<sup>10-12</sup> Subsequently, the share of public  
13 funding in the health care system decreased and the proportion of private financing  
14 increased.<sup>13 14</sup> For instance, under China's planned economy, health care in urban  
15 areas had been financed primarily through the Government Welfare Insurance  
16 Scheme and the Labor Insurance Scheme. The former covered mainly civil servants  
17 and government employees, college students, and veterans, whereas the latter was for  
18 workers and their dependents across all formal sectors of the economy.<sup>10 15</sup> However,  
19 these schemes faced challenges during the market-oriented economic reforms, which  
20 resulted in huge changes in health care financing patterns. Along with the higher  
21 demand by employees for quality care, and corresponding financial pressures making  
22 these demands unaffordable, financing from the Government Welfare Insurance  
23 Scheme and the Labor Insurance Scheme decreased markedly and citizens had to pay  
24 much higher OOP expenses for health care.<sup>16</sup> Meanwhile, for the majority of the rural  
25 population, and the poor in particular, the Cooperative Medical Scheme (CMS)

1 played a key role in guaranteeing access to basic health services.<sup>17 18</sup> However, the  
2 CMS began to collapse after the initiation of China's Household Contract  
3 Responsibility System in the early 1980s, which decreed that health care would be  
4 funded at the household level. Only 9.3% of rural farmers were still enrolled in the  
5 CMS, and over 80% had no health insurance coverage by 2002.<sup>19</sup> Rural residents  
6 without health insurance had to pay for their health care by direct payment, which  
7 created barriers to basic health services and made medical expenses unaffordable to  
8 the poor and vulnerable groups, especially in respect of health services that had  
9 become more expensive.<sup>20</sup>

10 Such transformations greatly changed China's health care financing structure.  
11 Between 1980 and 2002, the percentage of government spending for health care  
12 dropped from 36.24% to 15.69% and the percentage of citizens covered by public  
13 health insurance plummeted from 42.57% to 15.64%. Conversely, the share of health  
14 care spending as OOP payments increased from 21.19% to 57.72%.<sup>21</sup> Such a heavy  
15 dependence on OOP payments resulted in a segmented and tiered health care  
16 financing system.<sup>22</sup> Results from China's third National Health Services Survey  
17 showed that, in 2002, 48.9% of outpatients (57.0% and 45.8% in urban and rural  
18 areas, respectively) did not visit any health institution. Among those who were  
19 admitted but did not use inpatient services, 75.4% could not afford hospital  
20 expenses.<sup>19</sup>

21 In order to decrease OOP and provide basic health insurance to the general  
22 population, China's government took steps to establish and extend insurance  
23 coverage. In 1998, Urban Employee Basic Medical Insurance (UEBMI) was  
24 introduced to cover urban workers in the formal sector. UEBMI coverage was  
25 gradually extended from covering employees in the larger formal sector to those

1  
2  
3 1 working in all forms of organizations, such as government institutions, state-owned  
4  
5 2 and collective enterprises, private enterprises, enterprises with foreign investment,  
6  
7 3 social organizations and private non-profit units.<sup>23</sup> However, only providing coverage  
8  
9 4 to urban workers raised equity concern in relation to the remaining urban residents  
10  
11 5 who were not covered by the UEBMI scheme. Thus, in 2007, the Urban Residents'  
12  
13 6 Basic Medical Insurance (URBMI) scheme was launched to extend urban health  
14  
15 7 insurance coverage to an additional 155 million uninsured citizens, including the  
16  
17 8 unemployed, children, students and elderly persons without pensions.<sup>24</sup> Meanwhile, in  
18  
19 9 rural areas, the New Rural Cooperative Medical Scheme (NCMS) had been initiated  
20  
21 10 in 2003 with the purpose of rebuilding rural health insurance coverage. Since its  
22  
23 11 formation, China's authorities have provided additional public spending on NCMS,  
24  
25 12 which has achieved a high coverage level for rural residents, with the insured rate  
26  
27 13 increasing from 9.64% in 2002 to 94.44% in 2007.<sup>25</sup>

## 14 **METHODS**

### 15 **Data source**

16 The data for the analysis were drawn from two rounds of the National Health  
17 Services Survey conducted in Heilongjiang Province, China. The two rounds were  
18 conducted between August and October in 2003 and 2008 in the sample regions, with  
19 the information recorded in 2002 and 2007, respectively. Heilongjiang Province,  
20 located in the northeast of China, is a middle-income province in terms of per capita  
21 gross domestic product and has a population of more than 20 million people.<sup>26</sup> The  
22 per capita gross domestic product was 1,152.72 US dollars (USD) and 2,943.37 USD  
23 in Heilongjiang Province in 2002 and 2007, respectively. Adopting a multi-stage  
24 stratified random sampling method, the survey randomly selected 13 cities or  
25 counties. In every city or county, eight communities or villages were randomly

1 selected. Then, about 30 households were randomly selected from each community or  
2 village. Finally, 3,841 households with 11,572 individuals in 2003 and 5,530  
3 households with 15,817 individuals in 2008, respectively, were selected in the survey.  
4 Tables 1 2 present detailed data about the descriptive and socioeconomic  
5 characteristics for the urban and rural samples, respectively.

For peer review only

**Table 1** Descriptive statistics and socioeconomic characteristics for the urban sample

| Variable                                     | 2002  |          |           | 2007  |          |           |
|----------------------------------------------|-------|----------|-----------|-------|----------|-----------|
|                                              | Obs   | Mean     | Std. dev. | Obs   | Mean     | Std. dev. |
| Gender (female)                              | 2,613 | 0.50     |           | 3,140 | 0.51     |           |
| Age (years)                                  | 5,265 | 38.86    | 18.96     | 6,188 | 43.25    | 19.11     |
| 0–14                                         | 699   | 8.41     | 4.14      | 579   | 8.13     | 4.11      |
| 14–59                                        | 3,738 | 38.07    | 11.41     | 4,332 | 40.36    | 11.74     |
| 60+                                          | 828   | 68.14    | 6.43      | 1,277 | 68.99    | 6.65      |
| No. of household members (average)           | 1,923 | 2.74     | 0.91      | 2,433 | 2.67     | 0.97      |
| Equivalent household income                  | 1,923 | 806.33   | 1,031.35  | 2,433 | 1,285.26 | 1,061.11  |
| 1st quintile                                 | 383   | 197.22   | 46.95     | 485   | 492.12   | 108.42    |
| 2nd quintile                                 | 385   | 344.72   | 42.55     | 489   | 772.76   | 68.33     |
| 3rd quintile                                 | 385   | 511.15   | 58.14     | 486   | 1,038.58 | 87.83     |
| 4th quintile                                 | 385   | 787.23   | 108.75    | 487   | 1,412.04 | 128.86    |
| 5th quintile                                 | 385   | 2,188.16 | 1,648.92  | 486   | 2,712.05 | 1,610.68  |
| Equivalent OOP expenditure                   | 1,923 | 107.49   | 345.85    | 2,433 | 172.81   | 290.63    |
| Incidence of catastrophic health expenditure | 513   | 26.68%   |           | 869   | 35.72%   |           |
| Health insurance                             |       |          |           |       |          |           |
| None                                         | 3,120 | 59.26%   |           | 2,909 | 47.01%   |           |
| Any                                          | 2,145 | 40.74%   |           | 3,279 | 52.99%   |           |
| Public health insurance types                | 1,922 | 36.51%   |           | 2,988 | 48.29%   |           |
| UEBMI                                        | 1,374 | 26.10%   |           | 2,100 | 33.94%   |           |

1  
2  
3  
4  
5  
6  
7  
8  
9  
10  
11  
12  
13  
14  
15  
16  
17  
18  
19  
20  
21  
22  
23  
24  
25  
26  
27  
28  
29  
30  
31  
32  
33  
34  
35  
36  
37  
38  
39  
40  
41  
42  
43  
44  
45  
46

|                                |       |        |       |        |
|--------------------------------|-------|--------|-------|--------|
| URBMI                          | 0     | 0.00%  | 273   | 4.41%  |
| CMS (NCMS)                     | 6     | 0.11%  | 50    | 0.81%  |
| Other insurance                | 542   | 10.29% | 565   | 9.13%  |
| None                           | 3,343 | 63.49% | 3,200 | 51.71% |
| Private health insurance types | 359   | 6.82%  | 297   | 4.80%  |

Source: Authors' calculations from 2003–2008 National Health Services Survey data.  
 OOP, out-of-pocket; UEBMI, Urban Employee Basic Medical Insurance; URBMI, Urban Residents' Basic Medical Insurance; NCMS, New Rural Cooperative Medical Scheme.  
 All expenditures are presented in USD.  
 The threshold of the catastrophic health expenditure is 25% of nonfood household expenditure in this study.

**Table 2** Descriptive statistics and socioeconomic characteristics for the rural sample

| Variable                                     | 2002  |        |         | 2007  |          |          |
|----------------------------------------------|-------|--------|---------|-------|----------|----------|
|                                              | Obs   | Mean   | Std dev | Obs   | Mean     | Std dev  |
| Gender (female)                              | 3,063 | 0.49   |         | 4,808 | 0.50     |          |
| Age (years)                                  | 6,307 | 33.39  | 18.02   | 9,638 | 36.57    | 19.17    |
| 0–14                                         | 1,133 | 8.22   | 4.42    | 1,497 | 7.33     | 4.22     |
| 14–59                                        | 4,704 | 35.92  | 11.91   | 7,080 | 37.95    | 12.33    |
| 60+                                          | 470   | 68.70  | 7.06    | 1,061 | 68.57    | 7.46     |
| No. of household members (average)           | 1,918 | 3.29   | 1.12    | 3,097 | 3.25     | 1.16     |
| Equivalent household income                  | 1,918 | 408.49 | 334.99  | 3,097 | 975.97   | 708.17   |
| 1st quintile                                 | 383   | 155.97 | 35.45   | 619   | 426.42   | 87.44    |
| 2nd quintile                                 | 385   | 243.28 | 23.37   | 620   | 640.02   | 49.12    |
| 3rd quintile                                 | 383   | 326.94 | 27.49   | 620   | 826.73   | 57.68    |
| 4th quintile                                 | 384   | 443.90 | 45.74   | 619   | 1,075.66 | 93.17    |
| 5th quintile                                 | 383   | 873.13 | 492.62  | 619   | 1,911.79 | 1,079.40 |
| Equivalent OOP expenditure                   | 1,918 | 56.28  | 153.78  | 3,097 | 126.78   | 296.75   |
| Incidence of catastrophic health expenditure | 485   | 25.29% |         | 694   | 22.41%   |          |
| Health insurance                             |       |        |         |       |          |          |
| None                                         | 5,311 | 84.21% |         | 905   | 9.39%    |          |
| Any                                          | 996   | 15.79% |         | 8,733 | 90.61%   |          |
| Public health insurance types                | 597   | 9.47%  |         | 8,627 | 89.50%   |          |
| UEBMI                                        | 71    | 1.13%  |         | 34    | 0.35%    |          |
| URBMI                                        | 0     | 0.00%  |         | 4     | 0.04%    |          |

1  
2  
3  
4  
5  
6  
7  
8  
9  
10  
11  
12  
13  
14  
15  
16  
17  
18  
19  
20  
21  
22  
23  
24  
25  
26  
27  
28  
29  
30  
31  
32  
33  
34  
35  
36  
37  
38  
39  
40  
41  
42  
43  
44  
45  
46

|                                |       |        |       |        |
|--------------------------------|-------|--------|-------|--------|
| CMS (NCMS)                     | 347   | 5.50%  | 8,401 | 87.16% |
| Other insurance                | 179   | 2.84%  | 188   | 1.95%  |
| None                           | 5,710 | 90.53% | 1,012 | 10.50% |
| Private health insurance types | 402   | 6.37%  | 773   | 8.02%  |

Source: Authors' calculations from 2003–2008 National Health Services Survey data.  
 OOP, out-of-pocket; UEBMI, Urban Employee Basic Medical Insurance; URBMI, Urban Residents' Basic Medical Insurance; NCMS, New Rural Cooperative Medical Scheme.  
 All expenditures are presented in USD.  
 The threshold of the catastrophic health expenditure is 25% of nonfood household expenditure in this study.



1 We adopted the same questionnaire in the two rounds of the survey. The national  
2 survey gathers extensive information about households' socioeconomic and  
3 demographic characteristics, including urban–rural classification, number of  
4 household members, age, gender, educational attainment, professions of household  
5 members, and household expenditures. Monthly household expenditures on food,  
6 housing, clothing, traffic, electricity, water, fuel, communication, education, exercise,  
7 entertainment, medical care and other types of expenditure were queried through the  
8 household head or the member most familiar with the home's affairs. Unexpected  
9 expenditures during the previous year were also recorded. Regarding health care  
10 payments, information was obtained through two sources of data: one was the survey  
11 above, while other data were taken mainly from the local statistic yearbook of tariffs,  
12 taxes and contribution rates for public health insurance. With regard to general taxes,  
13 specific taxes that were considered included taxes on the purchase of cigarettes,  
14 alcohol, entertainment, electricity, gas and any excise taxes on restaurants, bars,  
15 lodging, and other consumption taxes. Taxes were approximated by applying specific  
16 tax rates to the corresponding expenditures. The proportion of government  
17 expenditure on health was 4.12% and 5.19% of government expenditure in 2002 and  
18 2007, respectively.<sup>27</sup> Since the government expenditure mainly came from general  
19 taxes, we assumed that the health financing took 4.12% and 5.19% of the total general  
20 taxes in 2002 and 2007, respectively. With regard to public health insurance, flat rate  
21 contributions were recorded directly in household interviews with respondents  
22 covered by the URBMI, CMS and NCMS. For respondents covered by the UEBMI,  
23 the contribution was estimated by applying contribution rates to the earnings of  
24 covered workers. Private health insurance premiums were obtained directly via  
25 household interviews. Information about OOP payments included health care

1 expenditures on outpatient care and prescriptions that were paid by individuals during  
 2 the two weeks prior to the household interview. Inpatient OOP expenditures during  
 3 the preceding 12 months were also recorded.<sup>28</sup>

#### 4 **Data analysis**

##### 5 **Measurement of ATP**

6 The unit of health care finance was on the household level, based on which  
 7 expenditures and health care payments were aggregated. The amount of household  
 8 expenditure was used as the measurement of ATP.<sup>28</sup> Adjustment was made according  
 9 to the size and age structure of the household to both ATP and each component of  
 10 health care financing. The scale of ‘adult equivalents’ (*AE*) in the household was  
 11 calculated as:

$$12 \quad AE = (A + 0.5K)^{0.75} \quad (1)$$

13 where *A* was the number of adults in the household and *K* the number of children (0–  
 14 14 years old).

##### 15 **AJL decomposition**

16 An AJL decomposition that measured the RE of health care payments on income  
 17 distribution was used to compare the inequality – as measured by the Gini coefficient  
 18 – of pre-payment income with that in post-payment incomes.<sup>7</sup> The ‘redistributive  
 19 impact’ can be defined as the reduction in the Gini coefficient caused by the health  
 20 care payments.<sup>6</sup> Thus:

$$21 \quad RE \equiv G^X - G^{X-P} \quad (2)$$

22 where  $G^X$  and  $G^{X-P}$  are the pre-payment and post-payment Gini coefficients,  
 23 respectively, wherein *X* denotes pre-payment income, or, more generally, some  
 24 measure of ATP, and *P* denotes health care payments. The AJL approach  
 25 demonstrated that the RE can be decomposed as:

$$RE = V - H - R \quad (3)$$

The first term, which AJL refer to as  $V$ , measures the inequality reduction that would have been obtained if there had been no differential health care payment. The second term, which AJL refer to as  $H$ , measures the extent of classical horizontal inequity – the unequal treatment of equals. The third term, which AJL refer to as  $R$ , measures the extent of reranking in the move from the pre-payment income distribution to the post-payment income distribution.<sup>7</sup> To distinguish and compute these components, groups of pre-payment equals are required to be artificially created. This is done by defining certain pre-payment income intervals, and then labelling all households with incomes in that range as equals. All households within an interval are attributed the mean within-interval income,  $x_j$ ;  $V$  itself can be decomposed into a ‘payment rate effect’ and a ‘progressivity effect’,

$$V = \left( \frac{g}{1-g} \right) K_E \quad (4)$$

with  $g$  the sample average health care payment rate (as a proportion of income) and  $K_E$  being the Kakwani index of payments computed under the assumption of within-group equality – that is, in all households in the same (pre-defined) bandwidth of (equal) pre-payment income, everyone pays the same amount (i.e. under horizontal equity conditions).

Horizontal inequity  $H$  is measured by the weighted sum of the group ( $j$ ) specific post-payment Gini coefficients,  $G_j^{X-P}$ , where weights are given by the product of the group’s population share and its post-payment income share,  $a_j$ :

$$H = \sum_j a_j G_j^{X-P} \quad (5)$$

$R$  captures the extent of reranking of households that occurs in the move from

1 pre-payment to post-payment income distributions. It is measured as the difference  
 2 between the post-payment Gini coefficient  $G^{X-P}$  and the post-payment concentration  
 3 index  $C^{X-P}$ . The latter differs from the former in that households are ranked by their  
 4 pre-payment income, not their post-payment income. If there is no reranking,  $R$  is  
 5 zero.

$$R = G^{X-P} - C^{X-P} \quad (6)$$

7 In sum, the total RE can be decomposed into four components: an average rate  
 8 effect ( $g$ ), the departure-from-proportionality or progressivity effect ( $K_E$ ), a horizontal  
 9 inequity effect  $H$  and a reranking effect  $R$ .

### 10 **Patient and public involvement**

11 All data in this study were derived from the household survey, so no patients and  
 12 the public were involved in the study design, the outcome measures, data analysis or  
 13 interpretation of the results. Results will be disseminated to study participants via this  
 14 publication. This study was approved by the Academic Research Ethics Committee of  
 15 Nanjing Medical University.

### 16 **RESULTS**

17 Decompositions of the RE of health care financing sources are presented in Tables  
 18 3 to 6. The distribution of health care financing sources across equivalent income  
 19 deciles, along with the corresponding values of  $g$ ,  $V$ ,  $H$ ,  $R$  and  $RE$ .  $V$ ,  $H$  and  $R$ , are  
 20 also presented as a percentage of RE.

### 21 **RE of urban areas in 2002**

22 In urban areas in 2002, payments to health care accounted for 15.70% of the total  
 23 household expenditures ( $g$  for Total payments in Table 3). The  $RE$  value was positive,  
 24 indicating health care financing had a pro-poor redistribution. The  $V/RE$  ratio was  
 25 359.42%, which indicated that the positive  $RE$  would be 259.42% greater in the

1  
2  
3 1 absence of horizontal inequity (that is, H + R). In terms of specific health care  
4  
5 2 financing source, general taxes and private health insurance exhibited pro-rich  
6  
7 3 redistribution, while public health insurance and OOP payment showed the opposite  
8  
9 4 effect. In addition, the negative *RE* of general tax and private health insurance would  
10  
11 5 be 24.68% and 50.60% smaller in the absence of horizontal inequity, while the  
12  
13 6 positive *RE* of public health insurance and OOP payment would be 19.77% and  
14  
15 7 231.53% greater in the absence of horizontal inequity.  
16  
17  
18  
19  
20  
21  
22  
23  
24  
25  
26  
27  
28  
29  
30  
31  
32  
33  
34  
35  
36  
37  
38  
39  
40  
41  
42  
43  
44  
45  
46  
47  
48  
49  
50  
51  
52  
53  
54  
55  
56  
57  
58  
59  
60

Table 3 Decomposition of the REs of the Chinese urban health care financing system in 2002

| Decile       | Per capital household expenditure | General taxes | Public health insurance | Private health insurance | OOP      | Total payments |
|--------------|-----------------------------------|---------------|-------------------------|--------------------------|----------|----------------|
| 1 (poorest)  | 1.97%                             | 2.07%         | 0.52%                   | 1.01%                    | 1.53%    | 1.44%          |
| 2            | 2.95%                             | 3.12%         | 0.81%                   | 4.92%                    | 2.19%    | 2.18%          |
| 3            | 3.86%                             | 4.08%         | 1.33%                   | 6.00%                    | 2.83%    | 2.86%          |
| 4            | 4.76%                             | 4.97%         | 2.83%                   | 3.65%                    | 3.94%    | 3.92%          |
| 5            | 5.74%                             | 5.89%         | 3.82%                   | 4.54%                    | 5.28%    | 5.12%          |
| 6            | 6.98%                             | 7.22%         | 4.91%                   | 6.45%                    | 5.87%    | 5.95%          |
| 7            | 8.64%                             | 9.09%         | 8.40%                   | 14.02%                   | 6.91%    | 7.70%          |
| 8            | 10.86%                            | 11.33%        | 17.03%                  | 9.31%                    | 8.70%    | 10.60%         |
| 9            | 14.60%                            | 14.85%        | 34.95%                  | 28.02%                   | 13.24%   | 17.58%         |
| 10 (richest) | 39.64%                            | 37.38%        | 25.40%                  | 22.10%                   | 49.51%   | 42.66%         |
| Total        | 100.00%                           | 100.00%       | 100.00%                 | 100.00%                  | 100.00%  | 100.00%        |
| <i>g</i>     |                                   | 0.003789      | 0.011082                | 0.008820                 | 0.133309 | 0.157001       |
| <i>V</i>     |                                   | -0.000063     | 0.001162                | -0.000666                | 0.014464 | 0.015376       |
| <i>H</i>     |                                   | 0.000021      | 0.000173                | 0.000382                 | 0.003487 | 0.004015       |
| <i>R</i>     |                                   | 0.000000      | 0.000019                | 0.000301                 | 0.006615 | 0.007083       |
| <i>RE</i>    |                                   | -0.000084     | 0.000970                | -0.001349                | 0.004363 | 0.004278       |
| <i>RE/RE</i> |                                   | 100.00%       | 100.00%                 | 100.00%                  | 100.00%  | 100.00%        |
| <i>V/RE</i>  |                                   | 75.32%        | 119.77%                 | 49.40%                   | 331.53%  | 359.42%        |
| <i>H/RE</i>  |                                   | -24.68%       | 17.84%                  | -28.32%                  | 79.92%   | 93.85%         |
| <i>R/RE</i>  |                                   | 0.00%         | 1.93%                   | -22.28%                  | 151.62%  | 165.57%        |

OOP, out-of-pocket.  
*g* = payments as fraction of income; *V* = vertical effect; *H* = horizontal inequity; *R* = reranking; *RE* = redistributive effect.

1  
2  
3 **1 RE of rural areas in 2002**  
4

5  
6 2 In rural areas in 2002, payments to health care accounted for 14.61% of the total  
7  
8 3 household expenditures (g for Total payments in Table 4). The *RE* value was  
9  
10 4 negative, indicating health care financing had a pro-rich redistribution. The *V/RE* ratio  
11  
12 5 was -311.62%, which indicated that the negative *RE* would be 411.62% smaller in the  
13  
14 6 absence of horizontal inequity. In terms of specific health care financing source, all  
15  
16 7 health care payments were pro-rich distributed. The negative *RE* of general taxes,  
17  
18 8 public and private health insurance and OOP payment would be 15.41%, 215.17%,  
19  
20 9 124.18% and 462.90% smaller in the absence of horizontal inequity.  
21  
22  
23  
24  
25  
26  
27  
28  
29  
30  
31  
32  
33  
34  
35  
36  
37  
38  
39  
40  
41  
42  
43  
44  
45  
46  
47  
48  
49  
50  
51  
52  
53  
54  
55  
56  
57  
58  
59  
60

Table 4 Decomposition of REs of Chinese rural health care financing system in 2002

| Decile       | Per capital household expenditure | General taxes | Public health insurance | Private health insurance | OOP       | Total payments |
|--------------|-----------------------------------|---------------|-------------------------|--------------------------|-----------|----------------|
| 1 (poorest)  | 3.09%                             | 3.43%         | 1.35%                   | 0.89%                    | 2.17%     | 2.22%          |
| 2            | 4.53%                             | 4.80%         | 1.46%                   | 3.23%                    | 4.43%     | 3.96%          |
| 3            | 5.46%                             | 5.86%         | 3.26%                   | 3.35%                    | 4.58%     | 4.55%          |
| 4            | 6.46%                             | 6.86%         | 6.37%                   | 4.59%                    | 5.34%     | 5.76%          |
| 5            | 7.38%                             | 7.75%         | 14.62%                  | 11.23%                   | 6.07%     | 7.95%          |
| 6            | 8.59%                             | 8.74%         | 13.18%                  | 10.80%                   | 8.90%     | 9.65%          |
| 7            | 9.93%                             | 10.29%        | 8.46%                   | 8.14%                    | 7.91%     | 8.42%          |
| 8            | 11.81%                            | 11.73%        | 12.11%                  | 20.12%                   | 12.55%    | 12.51%         |
| 9            | 14.97%                            | 15.08%        | 7.19%                   | 17.32%                   | 13.22%    | 12.60%         |
| 10 (richest) | 27.78%                            | 25.46%        | 31.99%                  | 20.33%                   | 34.83%    | 32.39%         |
| Total        | 100.00%                           | 100.00%       | 100.00%                 | 100.00%                  | 100.00%   | 100.00%        |
| <i>g</i>     |                                   | 0.003705      | 0.001190                | 0.003403                 | 0.137787  | 0.146085       |
| <i>V</i>     |                                   | -0.000094     | 0.000038                | 0.000104                 | 0.013238  | 0.013424       |
| <i>H</i>     |                                   | 0.000017      | 0.000043                | 0.000163                 | 0.004659  | 0.004876       |
| <i>R</i>     |                                   | 0.000000      | 0.000029                | 0.000371                 | 0.012227  | 0.012856       |
| <i>RE</i>    |                                   | -0.000111     | -0.000033               | -0.000431                | -0.003648 | -0.004308      |
| <i>RE-RE</i> |                                   | 100.00%       | 100.00%                 | 100.00%                  | 100.00%   | 100.00%        |
| <i>V-RE</i>  |                                   | 84.58%        | -115.17%                | -24.18%                  | -362.90%  | -311.62%       |
| <i>H-RE</i>  |                                   | -15.41%       | -127.93%                | -37.94%                  | -127.71%  | -113.19%       |
| <i>R-RE</i>  |                                   | 0.00%         | -87.24%                 | -86.25%                  | -335.18%  | -298.43%       |

OOP, out-of-pocket.  
*g* = payments as fraction of income; *V* = vertical effect; *H* = horizontal inequity; *R* = reranking; *RE* = redistributive effect.



1  
2  
3 **1 RE of urban areas in 2007**  
4

5  
6 2 In urban areas in 2007, 19.30% of household expenditure was paid to health care (g  
7  
8 3 for Total payments in Table 5). The *RE* value was negative, indicating health care  
9  
10 4 financing had a pro-rich redistribution. The *V/RE* ratio was -21.70%, which indicated  
11  
12 5 that the negative *RE* would be 121.70% smaller in the absence of horizontal inequity.  
13  
14  
15 6 In terms of specific health care financing source, general taxes, private health  
16  
17 7 insurance and OOP payment were pro-rich redistributed, while public health  
18  
19 8 insurance was pro-poor redistributed. In addition, the negative *RE* of general taxes,  
20  
21 9 private health insurance and OOP payment would be 52.60%, 306.03% and 88.42%  
22  
23  
24 10 smaller in the absence of horizontal inequity, while the positive *RE* of public health  
25  
26 11 insurance would be 40.92% greater in the absence of horizontal inequity.  
27  
28  
29  
30  
31  
32  
33  
34  
35  
36  
37  
38  
39  
40  
41  
42  
43  
44  
45  
46  
47  
48  
49  
50  
51  
52  
53  
54  
55  
56  
57  
58  
59  
60

Table 5 Decomposition of REs of Chinese urban health care financing system in 2007

| Decile       | Per capital household expenditure | General taxes | Public health insurance | Private health insurance | OOP       | Total payments |
|--------------|-----------------------------------|---------------|-------------------------|--------------------------|-----------|----------------|
| 1 (poorest)  | 3.14%                             | 3.49%         | 1.05%                   | 5.17%                    | 2.68%     | 2.59%          |
| 2            | 4.52%                             | 4.80%         | 2.36%                   | 2.82%                    | 4.16%     | 3.85%          |
| 3            | 5.55%                             | 5.66%         | 4.07%                   | 4.49%                    | 5.91%     | 5.37%          |
| 4            | 6.49%                             | 6.59%         | 5.30%                   | 6.46%                    | 6.75%     | 6.36%          |
| 5            | 7.47%                             | 7.46%         | 6.82%                   | 5.56%                    | 8.02%     | 7.51%          |
| 6            | 8.66%                             | 8.57%         | 9.01%                   | 4.27%                    | 9.10%     | 8.77%          |
| 7            | 10.16%                            | 9.95%         | 10.59%                  | 10.31%                   | 11.43%    | 10.83%         |
| 8            | 11.82%                            | 11.48%        | 12.68%                  | 15.70%                   | 13.55%    | 12.92%         |
| 9            | 14.54%                            | 14.62%        | 17.35%                  | 16.01%                   | 13.35%    | 14.70%         |
| 10 (richest) | 27.66%                            | 27.39%        | 30.77%                  | 29.20%                   | 25.04%    | 27.11%         |
| Total        | 100.00%                           | 100.00%       | 100.00%                 | 100.00%                  | 100.00%   | 100.00%        |
| <i>g</i>     |                                   | 0.004710      | 0.045590                | 0.008282                 | 0.134454  | 0.193035       |
| <i>V</i>     |                                   | -0.000022     | 0.005007                | 0.000428                 | -0.002364 | 0.003885       |
| <i>H</i>     |                                   | 0.000024      | 0.000995                | 0.000352                 | 0.005067  | 0.006355       |
| <i>R</i>     |                                   | 0.000000      | 0.000459                | 0.000284                 | 0.012975  | 0.015431       |
| <i>RE</i>    |                                   | -0.000046     | 0.003553                | -0.000208                | -0.020406 | -0.017901      |
| <i>RE-RE</i> |                                   | 100.00%       | 100.00%                 | 100.00%                  | 100.00%   | 100.00%        |
| <i>V-RE</i>  |                                   | 47.40%        | 140.92%                 | -206.03%                 | 11.58%    | -21.70%        |
| <i>H-RE</i>  |                                   | -52.60%       | 28.02%                  | -169.28%                 | -24.83%   | -35.50%        |
| <i>R-RE</i>  |                                   | 0.00%         | 12.91%                  | -136.75%                 | -63.59%   | -86.20%        |

OOP, out-of-pocket.  
*g* = payments as fraction of income; *V* = vertical effect; *H* = horizontal inequity; *R* = reranking; *RE* = redistributive effect.

1  
2  
3 **1 RE of rural areas in 2007**  
4

5  
6 2 In rural areas in 2007, 14.98% of household expenditure was paid to health care (g  
7  
8 3 for Total payments in Table 6). The *RE* value was negative, indicating health care  
9  
10 4 financing had a pro-rich redistribution. The *V/RE* ratio was -13.71%, which indicated  
11  
12 5 that the negative *RE* would be 113.71% smaller in the absence of horizontal inequity.  
13  
14 6 In terms of specific health care financing source, all health care payments were  
15  
16 7 pro-rich distributed. The negative *RE* of general taxes, public and private health  
17  
18 8 insurance and OOP payment would be 35.42%, 0.36%, 52.01% and 152.92% smaller  
19  
20 9 in the absence of horizontal inequity.  
21  
22  
23  
24  
25  
26  
27  
28  
29  
30  
31  
32  
33  
34  
35  
36  
37  
38  
39  
40  
41  
42  
43  
44  
45  
46  
47  
48  
49  
50  
51  
52  
53  
54  
55  
56  
57  
58  
59  
60

Table 6 Decomposition of REs of Chinese rural health care financing system in 2007

| Decile       | Per capital household expenditure | General taxes | Public health insurance | Private health insurance | OOP       | Total payments |
|--------------|-----------------------------------|---------------|-------------------------|--------------------------|-----------|----------------|
| 1 (poorest)  | 3.63%                             | 3.75%         | 11.08%                  | 4.30%                    | 3.36%     | 5.29           |
| 2            | 5.10%                             | 5.20%         | 9.74%                   | 10.25%                   | 4.97%     | 6.33           |
| 3            | 6.13%                             | 6.27%         | 9.70%                   | 5.94%                    | 5.81%     | 6.84           |
| 4            | 6.97%                             | 7.04%         | 10.05%                  | 10.28%                   | 7.15%     | 7.92           |
| 5            | 7.97%                             | 8.08%         | 9.74%                   | 9.46%                    | 7.77%     | 8.37           |
| 6            | 8.98%                             | 9.19%         | 9.59%                   | 8.00%                    | 7.94%     | 8.64           |
| 7            | 10.18%                            | 10.43%        | 10.62%                  | 10.08%                   | 9.06%     | 9.80           |
| 8            | 11.84%                            | 11.92%        | 10.08%                  | 12.33%                   | 11.25%    | 11.18          |
| 9            | 14.45%                            | 14.25%        | 10.37%                  | 9.58%                    | 15.62%    | 13.84          |
| 10 (richest) | 24.74%                            | 23.86%        | 9.03%                   | 19.78%                   | 27.06%    | 21.79          |
| Total        | 100.00%                           | 100.00%       | 100.00%                 | 100.00%                  | 100.00%   | 100.00%        |
| <i>g</i>     |                                   | 0.004744      | 0.002764                | 0.012405                 | 0.129908  | 0.149821       |
| <i>V</i>     |                                   | -0.000035     | -0.000864               | -0.001599                | 0.004933  | 0.002138       |
| <i>H</i>     |                                   | 0.000019      | 0.000003                | 0.000770                 | 0.004951  | 0.005788       |
| <i>R</i>     |                                   | 0.000000      | 0.000000                | 0.000962                 | 0.009306  | 0.011943       |
| <i>RE</i>    |                                   | -0.000053     | -0.000867               | -0.003331                | -0.009323 | -0.015593      |
| <i>RE-RE</i> |                                   | 100.00%       | 100.00%                 | 100.00%                  | 100.00%   | 100.00%        |
| <i>V-RE</i>  |                                   | 64.58%        | 99.64%                  | 47.99%                   | -52.92%   | -13.71%        |
| <i>H-RE</i>  |                                   | -35.42%       | -0.36%                  | -23.13%                  | -53.10%   | -37.12%        |
| <i>R-RE</i>  |                                   | 0.00%         | 0.00%                   | -28.88%                  | -99.82%   | -76.59%        |

OOP, out-of-pocket.  
*g* = payments as fraction of income; *V* = vertical effect; *H* = horizontal inequity; *R* = reranking; *RE* = redistributive effect.

## 1 DISCUSSION

2 Horizontal inequity decreased over the period 2002–2007 in both urban and rural  
3 areas. Meanwhile, the extent of reranking also reduced over the same period in both  
4 urban and rural areas, indicating that the impact of health care finance on  
5 impoverishment was lessened.

6 The biggest challenge for horizontal equity in China's health care finance  
7 originated from OOP payments. OOP payments as fraction of income ( $g$ ) were far  
8 larger than all other health care financing sources. This implied that the RE of total  
9 health care payment was largely dominated by OOP payments in China. Although  
10 OOP has been found to be the main reason for the pro-rich redistribution in other  
11 countries, the impact was much smaller than that in China.<sup>7 9</sup> For example, in  
12 Switzerland, horizontal inequity of OOP accounted for 12.4 percentage points of the  
13 RE, whereas reranking accounted for 9.8 percentage points of the RE.<sup>9</sup> Our study has  
14 shown that horizontal inequity in OOP payments has been reduced both in urban and  
15 rural areas over the period 2002–2007. The horizontal inequity in OOP payments had  
16 mainly stemmed from the different health conditions and health insurance schemes  
17 among individuals with the same income level. As the distribution of health  
18 conditions among the population was unlikely to have changed markedly during a  
19 relatively short time period, the reduction of horizontal inequity was more likely  
20 largely attributable to the reform and establishment of the new health insurance  
21 programmes. This finding agrees with a study from the Netherlands, in which vertical  
22 and horizontal inequity were both found to be largely attributable to the different  
23 choices of benefit packages of health insurance schemes.<sup>7</sup> The extent of reranking of  
24 OOP payments was much larger than other health care payments, and it was found  
25 that the rank order of individuals who financed health care through OOP payments

1 decreased markedly.

2 In 2002, urban public health insurance was the UEBMI scheme, and it covered  
3 mainly workers in the public sector. In 2007, the UEBMI and URBMI schemes were  
4 both in effect, with the former covering workers in both the public and private sectors,  
5 while the latter covered citizens who were ineligible to enroll in the UEBMI scheme,  
6 such as students, the elderly and the unemployed. China's public health insurance was  
7 managed and run at the city level and UEBMI premiums were different between  
8 cities. This was the main reason for the horizontal inequity in public health insurance  
9 in urban areas in 2002. Excluding this reason, in 2007, the different financing  
10 schemes between the UEBMI and the URBMI, as well as the disparity in financing  
11 contribution to the UEBMI between public and private sectors, also resulted in  
12 horizontal inequity. This explains why horizontal inequity in urban public health  
13 insurance increased over the period 2002–2007. In 2002, CMS provided rural public  
14 health insurance, covering less than 10% of rural residents. In 2007, NCMS covered  
15 over 90% of rural residents. Both CMS and NCMS were based on flat rate  
16 contributions. Thus, the horizontal inequity in rural health insurance came from the  
17 different financing contribution between different cities, and came from the covered  
18 and the uncovered parties. Since almost all rural residents were covered by NCMS in  
19 2007, the horizontal inequity in rural public health insurance was dramatically  
20 reduced over the period. Private health insurance did not play an important role in  
21 China's health insurance reform because the government decided to achieve Universal  
22 Health Coverage through public health insurance. Currently, only about 5% of the  
23 population is enrolled in private health insurance.<sup>29</sup> The insurees purchase different  
24 types of insurance from different insurance companies. Therefore, the horizontal  
25 inequities are comparatively high.

1 Our findings demonstrated that horizontal inequity in general taxes increased from  
2 2002 to 2007, and that horizontal inequity was higher in urban areas than in rural  
3 areas. The main income source for households in China in our sample was wages.  
4 Taxes for households consisted primarily of personal income tax. Because of  
5 economic development, individuals – and especially those in urban areas – earned  
6 their income from a variety of sources, and people with the same income levels had a  
7 much greater variety of income compositions than in the past. Different income types  
8 were subject to different tax rates, which resulted in increased horizontal inequity.  
9 Horizontal inequity in relation to personal income tax was found to have decreased  
10 between 1980 and 1990 in Sweden, where the ceiling of taxable income range was  
11 abolished following economic development. Overall, such a policy ensures that the  
12 tax is largely borne by the rich.<sup>8</sup>

13 Despite the fact that horizontal, vertical and reranking effects are usually expressed  
14 and explained as a percentage of the total RE, some results need to be interpreted with  
15 caution. Whilst the horizontal inequity of OOP and total payments in relative terms  
16 decreased over the period 2002–2007, in absolute terms, horizontal inequity increased  
17 over during that period in both urban and rural areas. As horizontal inequity was  
18 measured by the weighted sum of Gini coefficients in each income quintile group,<sup>7 8</sup>  
19 the increase of horizontal inequity in the absolute term indicates a more inequitable  
20 distribution within the income quintile group. Furthermore, the RE decreased both in  
21 urban and rural areas from 2002 to 2007 in our study, indicating that the health care  
22 financing system had become more pro-rich over the period. In a previous study in the  
23 same area, Chen *et al.* found that the Kakwani index of the total health care payments  
24 decreased from 2002 to 2007.<sup>29</sup> This is consistent with our study's finding that  
25 vertical equity (*V*) decreased over the period 2002–2007. We have also found that

1  
2  
3 1 horizontal inequity ( $H$ ) increased in both urban and rural areas over the same time  
4  
5 2 period. In addition, reranking ( $R$ ) decreased in rural areas but increased in urban areas  
6  
7 3 from 2002 to 2007. When considering  $V$ ,  $H$  and  $R$  together, RE decreased in both  
8  
9 4 urban and rural areas. This finding indicates that improving both vertical and  
10  
11 5 horizontal equity in health care financing system could improve pro-poor  
12  
13 6 redistribution to a large extent in the study population. However, equitable vertical  
14  
15 7 and horizontal distributions are hard to achieve simultaneously. Taking NCMS as an  
16  
17 8 example, a flat rate premium could result in an equitable horizontal distribution, but at  
18  
19 9 the cost of worsened vertical equity, as all insured individuals would pay the same  
20  
21 10 premium, irrespective of their incomes. In addition, some public insurance schemes  
22  
23 11 are financed at the county level and it is also important to consider other amenable  
24  
25 12 factors such as sex, age and location in policy interventions. Therefore, we should  
26  
27 13 weigh horizontal equity against vertical equity in health care financing system reform.  
28  
29 14 Future work is warranted to investigate the optimal trade-off between horizontal and  
30  
31 15 vertical equity to achieve a more pro-poor redistribution in the health care financing  
32  
33 16 system.

34  
35  
36  
37  
38  
39  
40 17 Health care financing has changed dramatically since the initiation of health  
41  
42 18 insurance reform within the study region. The proportion of general taxes in the health  
43  
44 19 care financing system increased from 15.15% in 2002 to 27.26% in 2015.<sup>27</sup> During  
45  
46 20 this time, with the help of information technology, a strict tax supervision policy was  
47  
48 21 implemented and tax avoidance was hard to achieve. This resulted in the reduction of  
49  
50 22 horizontal inequity in respect of general tax. Meanwhile, the proportion of public  
51  
52 23 health insurance in the health care financing system increased from 19.12% in 2002 to  
53  
54 24 36.76% in 2015.<sup>27</sup> However, due to the policy goal of universal health coverage and  
55  
56 25 an increasing rate of urbanization, the URBMI and NCMS schemes were gradually  
57  
58  
59  
60



1 integrated. This suggests that many more individuals with different natural and social  
2 characteristics were covered in the same insurance schemes, which in turn brought  
3 about an increase of horizontal inequity. On the contrary, the proportion of OOP  
4 payments notably decreased from 65.73% in 2002 to 35.98% in 2015.<sup>27</sup>  
5 Consequently, the horizontal inequity in respect of total health care finance was  
6 reduced by the decreasing impact of OOP payments.

7 The current study has only examined data from one province in China, which is  
8 unlikely to fully represent horizontal equity in China's health care financing system  
9 overall. Studies using nationally representative data are warranted to evaluate  
10 horizontal equity following the national health insurance reforms in China.

## 11 **CONCLUSIONS**

12 Overall, horizontal inequity in China's total health care financing has decreased  
13 during the period 2002–2007. In addition, OOP payments were found to have  
14 contributed most to the overall health care payments and horizontal inequity in OOP  
15 payments has decreased. These findings have important implications for future health  
16 care financing reforms: China's further health insurance reform should target cost and  
17 service coverage in order to decrease the impact of OOP payments.

## 19 **Ethics approval and consent to participate**

20 This study was approved by the Academic Research Ethics Committee of Nanjing  
21 Medical University. All procedures were undertaken in accordance with the ethical  
22 standards of the Helsinki Declaration. Participants provided informed consent prior to  
23 data collection.

## 24 **Acknowledgements**

25 We thank the National Health and Family Planning Commission, People's Republic

1 of China, for its support and cooperation, and the Health and Family Planning  
2 Commission of Heilongjiang Province for its cooperation and organization in relation  
3 to the field data collection. We would also like to thank all study participants for their  
4 time during the interview stages.

### 5 **Authors' contributions**

6 ZW led the study; he designed the study and led the data analysis and interpretation.  
7 MC contributed to the study design and wrote the manuscript. XZ analyzed the data  
8 and helped in the writing of the final draft of the manuscript. YG contributed to the  
9 study design and analyzed the data. LS supervised the study, contributed to the study  
10 design and wrote the manuscript. AP contributed to the study design, reviewed the  
11 manuscript and helped in the writing of the final draft of the manuscript. All authors  
12 read and approved the final manuscript.

### 13 **Competing interests**

14 None

### 15 **Funding**

16 This study was funded by the National Natural Science Foundation of China (Grant  
17 number: 71503137). LS was supported by a NHMRC Early Career Fellowship  
18 (GNT1139826). The funding bodies were not involved in the design of the study, or  
19 data collection, analysis, and interpretation or in writing the manuscript.

### 20 **Data sharing statement**

21 The datasets used in this study are not publicly available due to a confidentiality  
22 policy, but they are available from the corresponding author on reasonable request.

## 1      **References**

- 2      1. Chen M, Chen W, Zhao Y. New evidence on financing equity in China's health  
3      care reform--a case study on Gansu province, China. *BMC health services research*  
4      2012;12:466. doi: 10.1186/1472-6963-12-466
- 5      2. Lairson DR, Hindson P, Hauquitz A. Equity of health care in Australia. *Social*  
6      *science & medicine (1982)* 1995;41(4):475-82. [published Online First: 1995/08/01]
- 7      3. Liu GG, Zhao Z, Cai R, et al. Equity in health care access to: assessing the urban  
8      health insurance reform in China. *Social Science & Medicine* 2002;55(10):1779-94.  
9      [published Online First: 2002/10/18]
- 10     4. Asante A, Price J, Hayen A, et al. Equity in Health Care Financing in Low- and  
11     Middle-Income Countries: A Systematic Review of Evidence from Studies Using  
12     Benefit and Financing Incidence Analyses. *PloS one* 2016;11(4):e0152866. doi:  
13     10.1371/journal.pone.0152866 [published Online First: 2016/04/12]
- 14     5. Wan Q, Zhai T, Zhao Y. Research on Equity of Health Financing in Some Regions  
15     (in Chinese). *Chinese Health Economics* 2009;28(07):14-16.
- 16     6. Aronson JR, Johnson P, Lambert PJ. Redistributive effect and unequal income tax  
17     treatment. *The Economic Journal* 1994;104(423):262-70.
- 18     7. Wagstaff A, Eddy vD. Progressivity, horizontal equity and reranking in health care  
19     finance: a decomposition analysis for The Netherlands. *Journal of health economics*  
20     1997;16(5):499-516.
- 21     8. Gerdtham U-G, Sundberg G. Redistributive effects of Swedish health care finance.  
22     *International Journal of Health Planning and Management* 1998;13(4):289-306. doi:  
23     10.1002/(SICI)1099-1751(199810/12)13:4<289::AID-HPM524>3.0.CO;2-N
- 24     9. Bilger M. Progressivity, horizontal inequality and reranking caused by health  
25     system financing: a decomposition analysis for Switzerland. *J Health Econ*

- 1  
2  
3 1 2008;27(6):1582-93. doi: 10.1016/j.jhealeco.2008.07.009  
4  
5  
6 2 10. Wagstaff A, Yip W, Lindelow M, et al. China's health system and its reform: a  
7  
8 3 review of recent studies. *Health economics* 2009;18 Suppl 2:S7-23. doi:  
9  
10 4 10.1002/hec.1518 [published Online First: 2009/06/25]  
11  
12 5 11. Wang L, Li F, Zhang X. Progress and Challenges of China's Health Financing  
13  
14 6 System (*in Chinese*). *Chinese Health Economics* 2017;36(09):46-50.  
15  
16  
17 7 12. Zhou T. An Empirical Study of the Impact of Government Health Financing on  
18  
19 8 Health Status From the Perspective of Transnational Comparison (*in Chinese*). *World*  
20  
21 9 *Economy Studies* 2017(06):40-49+135-36.  
22  
23  
24 10 13. Yip W, Hanson K. Purchasing health care in China: experiences, opportunities  
25  
26 11 and challenges. *Advances in health economics and health services research*  
27  
28 12 2009;21:197-218. [published Online First: 2009/10/02]  
29  
30  
31 13 14. Nong Y. Financing of public health :government and private input (*in Chinese*).  
32  
33 14 *Health Economics Research* 2008(10):22-24.  
34  
35  
36 15 15. Yip W, Wagstaff A, Hsiao WC. Economic analysis of China's health care system:  
37  
38 16 turning a new page. *Health economics* 2009;18 Suppl 2:S3-6. doi: 10.1002/hec.1525  
39  
40 17 [published Online First: 2009/06/25]  
41  
42 18 16. Eggleston K, Yip W. Hospital competition under regulated prices: application to  
43  
44 19 urban health sector reforms in China. *International journal of health care finance and*  
45  
46 20 *economics* 2004;4(4):343-68. doi: 10.1023/B:IHFE.0000043762.33274.4f [published  
47  
48 21 Online First: 2004/10/07]  
49  
50  
51 22 17. Wang H, Yip W, Zhang L, et al. Community-based health insurance in poor rural  
52  
53 23 China: the distribution of net benefits. *Health policy and planning* 2005;20(6):366-74.  
54  
55 24 doi: 10.1093/heapol/czi045 [published Online First: 2005/09/07]  
56  
57  
58 25 18. Zhou C, Long Q, Chen J, et al. The effect of NCMS on catastrophic health  
59  
60

- 1  
2  
3 1 expenditure and impoverishment from tuberculosis care in China. *International*  
4  
5 2 *journal for equity in health* 2016;15(1):172. doi: 10.1186/s12939-016-0463-0  
6  
7  
8 3 [published Online First: 2016/10/21]  
9  
10 4 19. China's Ministry of Health. An analysis of the third national health services  
11  
12 5 survey. Beijing: Chinese Union Medical University Press, 2004.  
13  
14 6 20. Wang L, Wang A, Zhou D, et al. An Empirical Analysis of Rural-Urban  
15  
16 7 Differences in Out-Of-Pocket Health Expenditures in a Low-Income Society of  
17  
18 8 China. *PloS one* 2016;11(5):e0154563. doi: 10.1371/journal.pone.0154563 [published  
19  
20 9 Online First: 2016/05/26]  
21  
22 21. National Health Development Research Center. China National Health Accounts  
23  
24 10 Report 2003. Beijing: Ministry of Health, 2003.  
25  
26 11  
27 12 22. Wang L, Wang A, FitzGerald G, et al. Who benefited from the New Rural  
28  
29 13 Cooperative Medical System in China? A case study on Anhui Province. *BMC health*  
30  
31 14 *services research* 2016;16:195. doi: 10.1186/s12913-016-1441-3 [published Online  
32  
33 15 First: 2016/06/06]  
34  
35 16 23. Yip W, Hsiao WC, Chen W, et al. Early appraisal of China's huge and complex  
36  
37 17 health-care reforms. *Lancet (London, England)* 2012;379(9818):833-42. doi:  
38  
39 18 10.1016/s0140-6736(11)61880-1 [published Online First: 2012/03/06]  
40  
41 19 24. Yip W, Hsiao WC. The Chinese health system at a crossroads. *Health affairs*  
42  
43 20 *(Project Hope)* 2008;27(2):460-8. doi: 10.1377/hlthaff.27.2.460 [published Online  
44  
45 21 First: 2008/03/12]  
46  
47 22 25. China's Ministry of Health. An analysis of the fourth national health services  
48  
49 23 survey. Beijing: Chinese Union Medical University Press, 2009.  
50  
51 24 26. National Bureau of Statistics of China. China's Per Capita GDP in Provinces.  
52  
53 25 <http://data.stats.gov.cn/easyquery.htm?cn=E0103> (2007) Beijing [accessed September  
54  
55  
56  
57  
58  
59  
60

1  
2  
3 1 9 2017.  
4

5 27. National Health Development Research Center. China National Health Accounts  
6  
7 Report 2015. Beijing: Ministry of Health, 2015.  
8

9  
10 28. O'Donnell O, Eddy vD, Wagstaff A, et al. Analyzing Health Equity Using  
11  
12 Household Survey Data: A Guide to Techniques and Their Implementation.  
13  
14 Washington, DC: World Bank 2008.  
15

16  
17 29. Chen M, Zhao Y, Si L. Who pays for health care in China? The case of  
18  
19 Heilongjiang province. *PloS one* 2014;9(10):e108867. doi:  
20  
21 10.1371/journal.pone.0108867  
22

23  
24 10  
25  
26  
27  
28  
29  
30  
31  
32  
33  
34  
35  
36  
37  
38  
39  
40  
41  
42  
43  
44  
45  
46  
47  
48  
49  
50  
51  
52  
53  
54  
55  
56  
57  
58  
59  
60

**STROBE 2007 (v4) Statement—Checklist of items that should be included in reports of *cross-sectional studies***

| Section/Topic                | Item # | Recommendation                                                                                                                                                                       | Reported on page # |
|------------------------------|--------|--------------------------------------------------------------------------------------------------------------------------------------------------------------------------------------|--------------------|
| Title and abstract           | 1      | (a) Indicate the study's design with a commonly used term in the title or the abstract                                                                                               | 2                  |
|                              |        | (b) Provide in the abstract an informative and balanced summary of what was done and what was found                                                                                  | 2                  |
| <b>Introduction</b>          |        |                                                                                                                                                                                      |                    |
| Background/rationale         | 2      | Explain the scientific background and rationale for the investigation being reported                                                                                                 | 4                  |
| Objectives                   | 3      | State specific objectives, including any prespecified hypotheses                                                                                                                     | 6                  |
| <b>Methods</b>               |        |                                                                                                                                                                                      |                    |
| Study design                 | 4      | Present key elements of study design early in the paper                                                                                                                              | 8                  |
| Setting                      | 5      | Describe the setting, locations, and relevant dates, including periods of recruitment, exposure, follow-up, and data collection                                                      | 8                  |
| Participants                 | 6      | (a) Give the eligibility criteria, and the sources and methods of selection of participants                                                                                          | 8                  |
| Variables                    | 7      | Clearly define all outcomes, exposures, predictors, potential confounders, and effect modifiers. Give diagnostic criteria, if applicable                                             | 9                  |
| Data sources/<br>measurement | 8*     | For each variable of interest, give sources of data and details of methods of assessment (measurement). Describe comparability of assessment methods if there is more than one group | 9                  |
| Bias                         | 9      | Describe any efforts to address potential sources of bias                                                                                                                            | 9, 10              |
| Study size                   | 10     | Explain how the study size was arrived at                                                                                                                                            | 8                  |
| Quantitative variables       | 11     | Explain how quantitative variables were handled in the analyses. If applicable, describe which groupings were chosen and why                                                         | 10, 11             |
| Statistical methods          | 12     | (a) Describe all statistical methods, including those used to control for confounding                                                                                                | 10, 11             |
|                              |        | (b) Describe any methods used to examine subgroups and interactions                                                                                                                  | 10                 |
|                              |        | (c) Explain how missing data were addressed                                                                                                                                          | 11                 |
|                              |        | (d) If applicable, describe analytical methods taking account of sampling strategy                                                                                                   | N/A                |
|                              |        | (e) Describe any sensitivity analyses                                                                                                                                                | N/A                |
| <b>Results</b>               |        |                                                                                                                                                                                      |                    |
| Participants                 | 13*    | (a) Report numbers of individuals at each stage of study—eg numbers potentially eligible, examined for eligibility, confirmed                                                        | 8                  |

|                          |     |                                                                                                                                                                                                              |                |
|--------------------------|-----|--------------------------------------------------------------------------------------------------------------------------------------------------------------------------------------------------------------|----------------|
|                          |     | eligible, included in the study, completing follow-up, and analysed                                                                                                                                          |                |
|                          |     | (b) Give reasons for non-participation at each stage                                                                                                                                                         | N/A            |
|                          |     | (c) Consider use of a flow diagram                                                                                                                                                                           | N/A            |
| Descriptive data         | 14* | (a) Give characteristics of study participants (eg demographic, clinical, social) and information on exposures and potential confounders                                                                     | 9, 10          |
|                          |     | (b) Indicate number of participants with missing data for each variable of interest                                                                                                                          | N/A            |
| Outcome data             | 15* | Report numbers of outcome events or summary measures                                                                                                                                                         | 12             |
| Main results             | 16  | (a) Give unadjusted estimates and, if applicable, confounder-adjusted estimates and their precision (eg, 95% confidence interval). Make clear which confounders were adjusted for and why they were included | 26, 27, 28, 29 |
|                          |     | (b) Report category boundaries when continuous variables were categorized                                                                                                                                    | 26, 27, 28, 29 |
|                          |     | (c) If relevant, consider translating estimates of relative risk into absolute risk for a meaningful time period                                                                                             | N/A            |
| Other analyses           | 17  | Report other analyses done—eg analyses of subgroups and interactions, and sensitivity analyses                                                                                                               | N/A            |
| <b>Discussion</b>        |     |                                                                                                                                                                                                              |                |
| Key results              | 18  | Summarise key results with reference to study objectives                                                                                                                                                     | 16             |
| Limitations              | 19  | Discuss limitations of the study, taking into account sources of potential bias or imprecision. Discuss both direction and magnitude of any potential bias                                                   | 18, 19         |
| Interpretation           | 20  | Give a cautious overall interpretation of results considering objectives, limitations, multiplicity of analyses, results from similar studies, and other relevant evidence                                   | 19             |
| Generalisability         | 21  | Discuss the generalisability (external validity) of the study results                                                                                                                                        | 19             |
| <b>Other information</b> |     |                                                                                                                                                                                                              |                |
| Funding                  | 22  | Give the source of funding and the role of the funders for the present study and, if applicable, for the original study on which the present article is based                                                | 20             |

\*Give information separately for cases and controls in case-control studies and, if applicable, for exposed and unexposed groups in cohort and cross-sectional studies.

**Note:** An Explanation and Elaboration article discusses each checklist item and gives methodological background and published examples of transparent reporting. The STROBE checklist is best used in conjunction with this article (freely available on the Web sites of PLoS Medicine at <http://www.plosmedicine.org/>, Annals of Internal Medicine at <http://www.annals.org/>, and Epidemiology at <http://www.epidem.com/>). Information on the STROBE Initiative is available at [www.strobe-statement.org](http://www.strobe-statement.org).
